# Supplementary material
Source: PubMed Central journal article supplement (PMC2741538)
Supplement: NIHMS140836-supplement-1_si_001.pdf [file NIHMS140836-supplement-1_si_001.pdf]

**Supporting information**

**CHARMM Additive All-Atom Force Field for Aldopentofuranoses, Methyl-  
Aldopentofuranosides and Fructofuranose**

*Elizabeth Hatcher, Olgun Guvench, Alexander D. MacKerell, Jr.\**

Department of Pharmaceutical Sciences, 20 Penn Street HSF II, University of Maryland,  
Baltimore, Maryland 21201

\*Corresponding author: [alex@outerbanks.umaryland.edu](mailto:alex@outerbanks.umaryland.edu)

Table S1. Errors in calculated average bond lengths and angles from simulations of infinite crystals of aldopentofuranoses relative the experimental crystal values. Here  $\alpha$ -arabinofuranose is denoted  $\alpha$ -Ara,  $\alpha$ -xylofuranose is denoted  $\alpha$ -Xyl,  $\alpha$ -lyxofuranose is denoted  $\alpha$ -Lyx,  $\beta$ -arabinofuranose is denoted  $\beta$ -Ara and  $\beta$ -ribofuranose is  $\beta$ -Rib.

|        | $\alpha$ -Ara | $\alpha$ -Xyl | $\alpha$ -Lyx | $\beta$ -Ara | $\beta$ -Rib | avg    |
|--------|---------------|---------------|---------------|--------------|--------------|--------|
| bonds  |               |               |               |              |              |        |
| c1c2   | 0.002         | 0.005         | 0.007         | -0.002       | 0.013        | 0.005  |
| c1o1   | 0.005         | 0.002         | 0.007         | -0.002       | 0.001        | 0.003  |
| c2c3   | 0.014         | 0.008         | 0.010         | -0.001       | 0.021        | 0.010  |
| c2o2   | -0.012        | -0.002        | -0.007        | 0.010        | 0.006        | -0.001 |
| c3c4   | -0.006        | 0.004         | 0.009         | -0.004       | 0.007        | 0.002  |
| c3o3   | -0.012        | -0.014        | -0.011        | -0.008       | 0.001        | -0.009 |
| c4c5   | -0.003        | -0.005        | 0.007         | -0.002       | 0.013        | 0.002  |
| c4o4   | 0.004         | -0.010        | -0.010        | -0.016       | -0.001       | -0.007 |
| c5o5   | 0.001         | 0.005         | -0.006        | 0.011        | 0.008        | 0.004  |
| o1cm   | 0.001         | 0.004         | -0.019        | 0.011        | 0.006        | 0.000  |
| o4c1   | -0.014        | -0.002        | 0.003         | 0.003        | 0.003        | -0.001 |
| angles |               |               |               |              |              |        |
| c1c2c3 | -0.49         | -0.46         | -1.25         | 1.67         | -1.43        | -0.39  |
| c2c1o1 | 1.28          | 1.86          | -0.95         | 2.61         | -1.38        | 0.68   |
| c2c3c4 | 0.72          | -0.62         | 1.10          | 0.97         | 0.21         | 0.48   |
| c3c2o2 | -1.58         | -0.98         | 0.34          | -0.74        | 5.44         | 0.50   |
| c3c4o4 | -0.60         | 1.39          | 0.07          | 0.23         | 0.29         | 0.28   |
| c4c3o3 | -0.16         | 1.66          | 2.77          | 1.97         | 0.06         | 1.26   |
| c4c5o5 | 0.49          | 0.09          | 0.10          | -1.20        | 1.18         | 0.13   |
| c4o4c1 | -0.19         | -1.37         | -0.76         | -0.72        | -1.23        | -0.85  |

|           |       |       |       |       |       |       |
|-----------|-------|-------|-------|-------|-------|-------|
| o4c1c2    | -0.52 | 0.50  | 1.72  | -0.63 | 0.50  | 0.31  |
| o4c4c5    | 2.79  | 0.81  | 2.09  | -2.00 | -1.18 | 0.50  |
| o4c1o1    | 0.30  | -1.54 | 0.83  | -0.69 | 0.54  | -0.11 |
| c1o1cm    | -0.47 | 0.01  | -0.71 | 0.05  | -0.88 | -0.40 |
| dihedrals |       |       |       |       |       |       |
| c1c2c3c4  | -3.3  | 0.6   | -3.3  | -9.5  | -3.5  | -3.8  |
| c1o4c4c5  | 2.7   | 4.5   | 2.8   | -9.7  | -5.3  | -1.0  |
| c2c1o1cm  | 1.2   | 1.5   | 16.9  | 0.9   | 6.2   | 5.3   |
| c2c3c4o4  | 1.2   | -0.8  | 0.5   | 10.4  | 5.6   | 3.4   |
| c3c2o2ho2 | -1.5  | -2.7  | 0.7   | -6.7  | 2.1   | -1.6  |
| c3c4o4c1  | 2.0   | 1.0   | 1.5   | -10.3 | -6.4  | -2.5  |
| c4c3o3ho3 | -2.5  | 8.3   | 7.0   | 19.7  | -0.48 | 6.4   |
| c4c5o5ho5 | -19.6 | -8.5  | 13.0  | 7.1   | -2.3  | -2.1  |
| o4c1c2c3  | 4.7   | 0.5   | 4.1   | 4.2   | -0.8  | 2.5   |
| o4c4c5o5  | 6.3   | 1.2   | -3.4  | -7.0  | 1.9   | -0.2  |

Table S2. Vibrational analysis of  $\alpha$ -arabinofuranose. QM frequencies were calculated the MP2/6-31G(d) level. A scaling factor of 0.9434 was applied to the QM frequencies to account for the limitations in the level of theory.<sup>2</sup> The internal coordinate system in the Pulay methodology was used for the vibrational modes.<sup>3</sup>

| QM frequency | vibrational mode <sup>a</sup> | contribution | MM frequency | vibrational mode <sup>a</sup> | contribution |
|--------------|-------------------------------|--------------|--------------|-------------------------------|--------------|
| 88.4         | tC5OH                         | 30           | 70.3         | tRing                         | 78           |
|              | tC4C5                         | 27           |              | tC4C5                         | 18           |
|              | tRing                         | 21           | 121.9        | tCOH                          | 84           |
|              | tRing'                        | 16           | 129.9        | tRing'                        | 35           |
| 121.9        | tRing                         | 43           |              | tCOH                          | 32           |
|              | tC5OH                         | 36           | 145.9        | tC4C5                         | 67           |
|              | tRing'                        | 18           |              | tRing                         | 16           |
| 140          | tC4C5                         | 54           | 193.5        | tCOH                          | 48           |
|              | tC5OH                         | 26           |              | tRing'                        | 19           |
|              | tRing                         | 16           | 222.9        | rC4                           | 22           |
| 184.1        | tRing'                        | 50           |              | tRing'                        | 16           |
|              | tRing                         | 30           | 278.3        | scCCO                         | 22           |
| 229.1        | rC4                           | 36           | 285.6        | rRing                         | 38           |
|              | scCCO                         | 22           | 339.4        |                               |              |
| 249.5        | rRing                         | 45           | 364.3        | twRing                        | 27           |
| 269.4        | twRing                        | 18           |              | tC5OH                         | 27           |
|              | twC4                          | 17           |              | wRing                         | 19           |
|              | wC4                           | 17           | 388.3        | twRing                        | 28           |
| 302          | twRing                        | 34           |              | wRing                         | 22           |
|              | rRing                         | 22           | 426.8        | rRing                         | 30           |
|              | wRing                         | 19           |              | tC5OH                         | 15           |
| 357.7        | twRing                        | 35           | 479.6        | twRing                        | 41           |
|              | wRing                         | 17           |              | wRing                         | 30           |
| 367.6        | tCOH                          | 75           | 504.1        | rRing                         | 37           |
| 406.2        | twRing                        | 22           |              | sC-Oh                         | 24           |
|              | tCOH                          | 22           | 579.6        | dRing'                        | 25           |
|              | wRing                         | 20           |              | scCCO                         | 21           |
| 466.6        | twRing                        | 25           |              | rRing                         | 15           |
|              | scCCO                         | 17           | 604.1        | tCOH                          | 43           |
| 532.7        | tCOH                          | 96           |              | dRing'                        | 24           |
| 562.5        | sC-Oh                         | 25           | 619.7        | tCOH                          | 39           |
|              | rRing                         | 24           | 661.9        | dRing                         | 42           |
| 592.9        | tCOH                          | 84           |              | rRing                         | 22           |
| 635.8        | scCCO                         | 15           | 860.8        | rCH2                          | 54           |
| 694.7        | dRing'                        | 42           | 873.6        | rCH2                          | 22           |
| 796.6        | dRing                         | 40           |              | sC4-O4                        | 16           |
|              | rRing                         | 17           | 950.8        | sC4-C5                        | 18           |
| 849          | sC4-O4                        | 35           | 1017.9       | sO4-C1                        | 26           |
|              | sO4-C1                        | 20           |              | sC2-C3                        | 17           |
|              | rCH2                          | 17           | 1035         | sC2-C3                        | 17           |
| 873.8        | sC3-C4                        | 18           | 1072.4       | sC5-O5                        | 29           |
|              | sC5-O5                        | 16           | 1083.3       | sC-Oh                         | 39           |
| 913.4        | sC1-C2                        | 28           |              | dCOHr                         | 20           |
| 965.3        | sO4-C1                        | 20           | 1109.4       | sC-Oh                         | 23           |
|              | sC2-C3                        | 19           |              | dCOHr                         | 17           |
|              | sC-Oh                         | 15           | 1138         | sC-Oh                         | 25           |

|        |         |     |        |         |     |
|--------|---------|-----|--------|---------|-----|
| 981.6  | sC5-O5  | 24  | 1161.3 | scRing  | 35  |
|        | sC3-C4  | 18  |        | sC-Oh   | 29  |
| 1021.8 | sC-Oh   | 37  | 1168.1 | sC4-O4  | 23  |
|        | twRing  | 20  |        | dCOHr   | 15  |
| 1042.9 | sC-Oh   | 21  | 1235.8 | dC5OH   | 31  |
|        | rCH2    | 15  |        | twCH2   | 22  |
| 1058.8 | sC-Oh   | 26  |        | dCOHr   | 16  |
|        | sC4-O4  | 16  | 1237.5 | wRing   | 35  |
| 1064.9 | sC-Oh   | 62  |        | dCOHr   | 21  |
| 1081   | sC-Oh   | 30  |        | twRing  | 17  |
|        | sC5-O5  | 17  | 1267.9 | dCOHr   | 29  |
| 1094.2 | sC-Oh   | 30  |        | twCH2   | 17  |
| 1153.8 | dCOHr   | 24  | 1272.6 | twCH2   | 36  |
|        | dC5OH   | 23  |        | dC5OH   | 25  |
| 1182.7 | wRing   | 22  | 1290   | dCOHr   | 43  |
|        | dC5OH   | 18  | 1317.5 | dCOHr   | 33  |
| 1212.7 | dCOHr   | 34  |        | wRing   | 26  |
| 1232.3 | twCH2   | 23  | 1348.9 | wRing   | 24  |
|        | scRing  | 16  |        | dCOHr   | 23  |
| 1238.3 | twCH2   | 37  | 1370.4 | scC4    | 28  |
|        | wRing   | 23  | 1393.8 | scRing  | 31  |
| 1255.7 | scRing  | 47  |        | wRing   | 24  |
|        | wRing   | 21  | 1413   | scCH2   | 73  |
| 1278.2 | wC4     | 25  |        | wCH2    | 18  |
|        | scRing  | 19  | 1469.9 | scRing  | 35  |
| 1316.6 | rRing   | 21  |        | sC-Oh   | 23  |
|        | dCOHr   | 21  | 1519   | wC4     | 33  |
|        | scRing  | 19  |        | twC4    | 16  |
| 1322.9 | wRing   | 22  | 1563.7 | sC-Oh   | 21  |
|        | scC4    | 21  |        | scRing  | 20  |
|        | dCOHr   | 16  | 1566.8 | wCH2    | 40  |
| 1337.6 | wRing   | 20  |        | sC5-O5  | 27  |
|        | wC4     | 16  |        | scCH2   | 25  |
|        | scC4    | 16  | 1613.9 | scRing  | 27  |
| 1385   | scRing  | 23  |        | sC-Oh   | 24  |
|        | dCOHr   | 15  |        | rRing   | 21  |
|        | scC4    | 15  | 2855.1 | sCH2    | 99  |
| 1396.5 | wCH2    | 68  | 2865.5 | sCH     | 99  |
|        | dC5OH   | 15  | 2889.2 | sCH2a   | 99  |
| 1409.6 | dCOHr   | 57  | 2907.1 | sCH     | 100 |
|        | scRing  | 35  | 2913.5 | sCH     | 99  |
| 1429   | dCOHr   | 62  | 2919.1 | sCH     | 100 |
|        | scRing  | 28  | 3661.3 | sOHring | 86  |
| 1476.7 | scCH2   | 100 | 3683.7 | sOHring | 99  |
| 2906.6 | sCH2    | 63  | 3688.7 | sOHring | 100 |
|        | sCH     | 33  | 3690.2 | sO5-H   | 85  |
| 2918   | sCH     | 67  |        |         |     |
|        | sCH2    | 32  |        |         |     |
| 2951.5 | sCH     | 99  |        |         |     |
| 2969.7 | sCH     | 96  |        |         |     |
| 2971.9 | sCH2a   | 91  |        |         |     |
| 3020.9 | sCH     | 100 |        |         |     |
| 3429.2 | sOHring | 100 |        |         |     |

|        |         |     |  |  |  |
|--------|---------|-----|--|--|--|
| 3466.4 | sOHring | 100 |  |  |  |
| 3530.7 | sOHring | 100 |  |  |  |
| 3579.5 | sO5-H   | 100 |  |  |  |

<sup>a</sup> where t=torsion, tw=twisting, r=rocking, w=wagging, sc=scissoring, s=stretching and d=deformation

Table S3. Table of all of the aldopentofuranose parametrized torsion. “F” represents the fit dihedrals, “V” represents the dihedrals used to validate the dihedral parameters. “T” represents the dihedrals transferred. “X” represents a non-existent dihedral

|           | $\alpha$ -Ara | $\beta$ -Ara | $\alpha$ -Rib | $\beta$ -Rib | $\alpha$ -Lyx | $\beta$ -Lyx | $\alpha$ -Xyl | $\beta$ -Xyl | $\alpha$ -Deo | $\beta$ -Deo |
|-----------|---------------|--------------|---------------|--------------|---------------|--------------|---------------|--------------|---------------|--------------|
| c1c2c3c4  | F             | F            | F             | F            | T             | T            | T             | T            | F             | F            |
| c1c2c3o3  | F             | F            | F             | F            | T,V           | T            | T             | T            | F             | F            |
| c1c2o2ho2 | F             | F            | F             | F            | T             | T            | T             | T            | X             | X            |
| c1o4c4c3  | F             | F            | F             | F            | T             | T            | T             | T            | T             | T            |
| c1o4c4c5  | F             | F            | F             | F            | T             | T            | T             | T            | T             | T            |
| c2o1o1ho1 | F             | F            | F             | F            | T             | T            | T             | T,V          | F             | F            |
| c2c3c4o4  | F             | F            | F             | F            | T             | T            | T             | T            | F             | F            |
| c2c3o3ho3 | F             | F            | F             | F            | T             | T            | T             | T            | F             | F            |
| c3c2c1o1  | F             | F            | F             | F            | T             | T            | T             | T            | F             | F            |
| c3c2c1o4  | F             | F            | F             | F            | T             | T            | T             | T            | F             | F            |
| c3c2o2ho2 | F             | F            | F             | F            | T,V           | T            | T             | T            | X             | X            |
| c3c4c5o5  | F             | F            | F             | F            | T             | T            | T             | T            | T             | T            |
| c4c3c2o2  | F             | F            | F             | F            | T             | T            | T             | T            | X             | X            |
| c4c3o3ho3 | F             | F            | F             | F            | T             | T            | T,V           | T            | T             | T            |
| c4c5o5ho5 | F             | F            | F             | F            | T,V           | T            | T             | T,V          | T             | T            |
| c4o4c1c2  | F             | F            | F             | F            | T             | T            | T             | T            | F             | F            |
| c4o4c1o1  | F             | F            | F             | F            | T             | T            | T,V           | T            | T             | T            |
| c5c4c3o3  | F             | F            | F             | F            | T             | T            | T             | T            | T             | T            |
| o1c1c2o2  | F             | F            | F             | F            | T             | T            | T             | T            | X             | X            |
| o2c2c3o3  | F             | F            | F             | F            | T             | T            | T             | T            | X             | X            |
| o2c2c1o4  | F             | F            | F             | F            | T             | T            | T             | T,V          | X             | X            |
| o3c3c4o4  | F             | F            | F             | F            | T             | T            | T,V           | T            | T             | T            |
| o4c1o1ho1 | F             | F            | F             | F            | T             | T            | T             | T            | T             | T            |
| o4c4c5o5  | F             | F            | F             | F            | T             | T            | T             | T            | T             | T            |

Table S4.  $\phi/\psi$  values of the two lowest energy North and South conformations and QM (MP2/cc-pVTZ//MP2/6-31G(d)) and MM energies from the 2D ring pucker surfaces. Both QM and MM energies have been zeroed for comparison purposes. Energies are in kcal/mol

|               | QM<br>North $\phi/\psi$ | MM<br>North $\phi/\psi$ | $E_{QM}$ | $E_{MM}$ | $E_{MM}-E_{QM}$ | QM<br>South $\phi/\psi$ | MM<br>South $\phi/\psi$ | $E_{QM}$ | $E_{MM}$ | $E_{MM}-E_{QM}$ |
|---------------|-------------------------|-------------------------|----------|----------|-----------------|-------------------------|-------------------------|----------|----------|-----------------|
| $\alpha$ -Ara | -30/40                  | -30/40                  | 0.38     | 0.65     | 0.27            | 40/-30                  | 40/-30                  | 0.00     | 0.00     | 0.00            |
| $\beta$ -Ara  | -40/40                  | -40/40                  | 0.00     | 0.00     | 0.00            | 20/-40                  | 40/-40                  | 0.44     | 0.20     | -0.24           |
| $\alpha$ -Rib | -30/40                  | -30/40                  | 0.31     | 0.00     | -0.31           | 40/-40                  | 40/-40                  | 0.00     | 0.65     | 0.65            |
| $\beta$ -Rib  | -40/30                  | -40/30                  | 0.00     | 0.00     | 0.00            | 0/-20                   | 0/-20                   | 1.65     | 1.28     | -0.37           |
| $\alpha$ -Deo | -10/30                  | -20/40                  | 2.46     | 0.70     | -1.76           | 40/-40                  | 40/-30                  | 0.00     | 0.01     | 0.01            |
| $\beta$ -Deo  | -40/30                  | -40/30                  | 0.00     | 0.16     | 0.16            | -10/-10                 | -10/-10                 | 0.04     | 0.00     | -0.04           |



Table S5. Comparison of water interaction energies and O...H distance by HF/6-31G(d) QM calculations and CHARMM force field for the pair conformations shown in Figure S1.

|                      |        | $E_{QM}$<br>(kcal/mol) | $E_{MM}$<br>(kcal/mol) | $E_{MM} - E_{QM}$<br>(kcal/mol) | $R_{QM}$ (Å) <sup>a</sup> | $R_{MM}$ (Å) | $R_{MM} - R_{QM}$<br>(Å) |
|----------------------|--------|------------------------|------------------------|---------------------------------|---------------------------|--------------|--------------------------|
| <i>O</i> -methyl-THF | Pair 1 | -7.44                  | -7.14                  | 0.30                            | 1.80                      | 1.75         | -0.05                    |
|                      | Pair 2 | -5.70                  | -5.46                  | 0.24                            | 1.84                      | 1.77         | -0.07                    |
|                      | Pair 3 | -5.92                  | -5.79                  | 0.13                            | 1.85                      | 1.78         | -0.07                    |
|                      | Pair 4 | -5.83                  | -6.58                  | -0.76                           | 1.86                      | 1.74         | -0.11                    |
|                      | Pair 5 | -4.88                  | -4.63                  | 0.25                            | 1.95                      | 1.84         | -0.11                    |
|                      | Pair 6 | -5.55                  | -5.75                  | -0.20                           | 1.92                      | 1.80         | -0.12                    |
|                      | Pair 7 | -4.50                  | -4.03                  | 0.47                            | 1.95                      | 1.85         | -0.10                    |
|                      | Pair 8 | -7.30                  | -7.40                  | -0.10                           | 1.85                      | 1.76         | -0.09                    |
| Average              |        |                        |                        | 0.07                            |                           |              | -0.06                    |
| <i>RMSE</i>          |        |                        |                        | 0.37                            |                           |              | 0.26                     |

<sup>a</sup>  $E_{QM}$  values are scaled by 1.16, and 0.2 is subtracted from the  $R_{QM}$  values

Table S6. Average pseudorotation angles and amplitudes from the crystal simulations compared to the experimental crystal structure results.

| Pseudorotation angle and amplitude | Expt P | Calc P | Diff | Expt $\Phi_m$ | Calc $\Phi_m$ | Diff |
|------------------------------------|--------|--------|------|---------------|---------------|------|
| Me- $\alpha$ -arabinofuranoside    | 61     | 65     | 4    | 41            | 42            | 1    |
| Me- $\beta$ -arabinofuranoside     | 322    | 305    | -18  | 40            | 39            | -1   |
| Me- $\beta$ -ribofuranoside        | 350    | 339    | -11  | 38            | 39            | 1    |
| Me- $\alpha$ -lyxofuranoside       | 28     | 34     | 6    | 44            | 43            | -1   |
| Me- $\alpha$ -xylofuranoside       | 156    | 154    | -2   | 40            | 41            | 1    |

Tables S7 and S8 (topology and parameter files) are appended after the references

Figure S1. Water-*O*-methyl-THF interaction pairs. For simplicity the water molecules are shown simultaneously, but during the calculations the individual monohydrate pairs were analyzed. Molecular graphics prepared with VMD.<sup>1</sup>

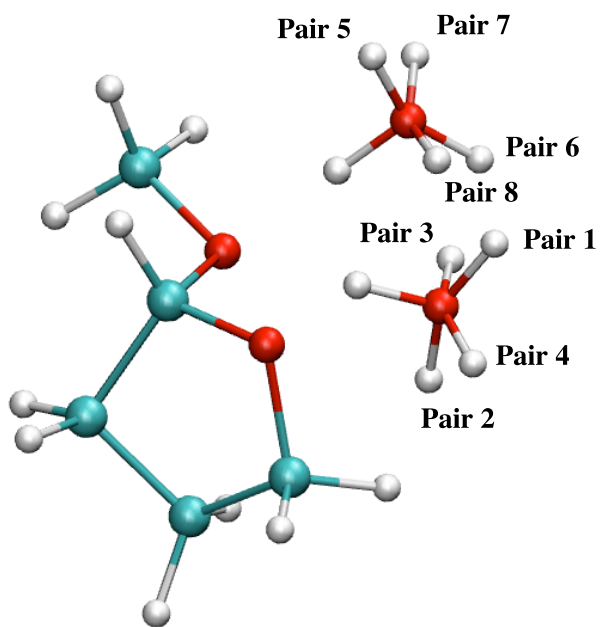

Figure S2. Potential energy scans of 146 conformations of  $\alpha$ -lyxofuranose,  $\alpha$ -xylofuranose,  $\beta$ -xylofuranose. QM results given with an energy cutoff at 12 kcal/mol. QM is black, MM using transferred arabinofuranose and ribofuranose parameters is red.

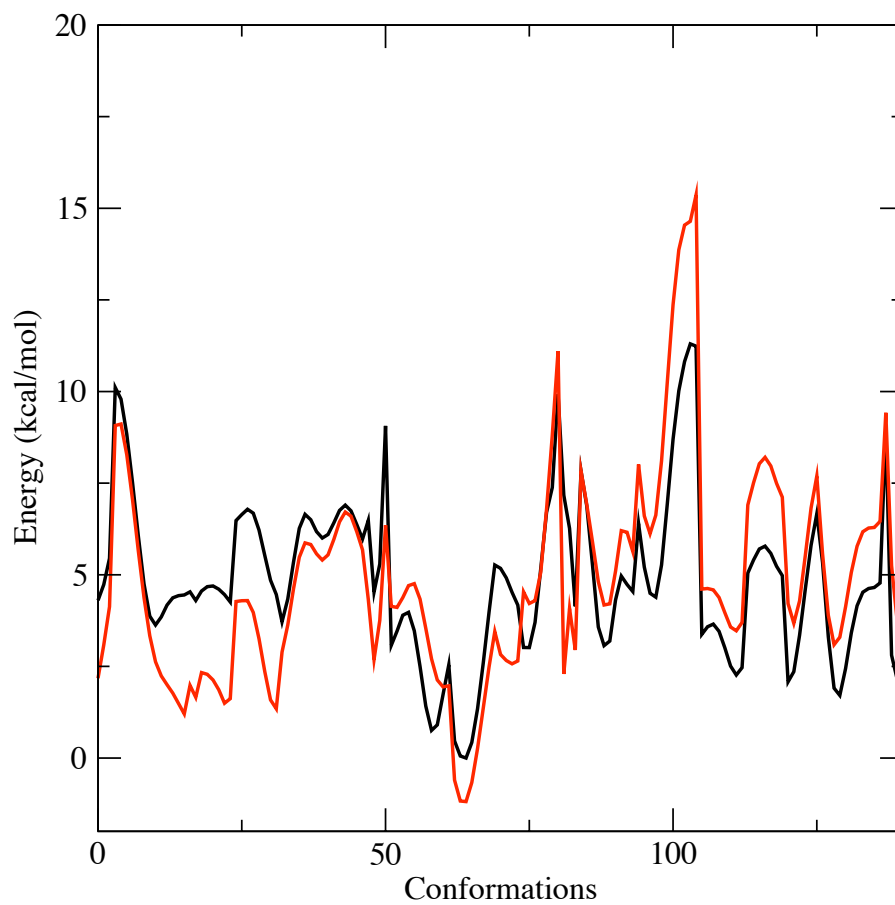

Figure S3. Potential energy scan *O*-methyl-THF. QM results are in black and MM results are in red.

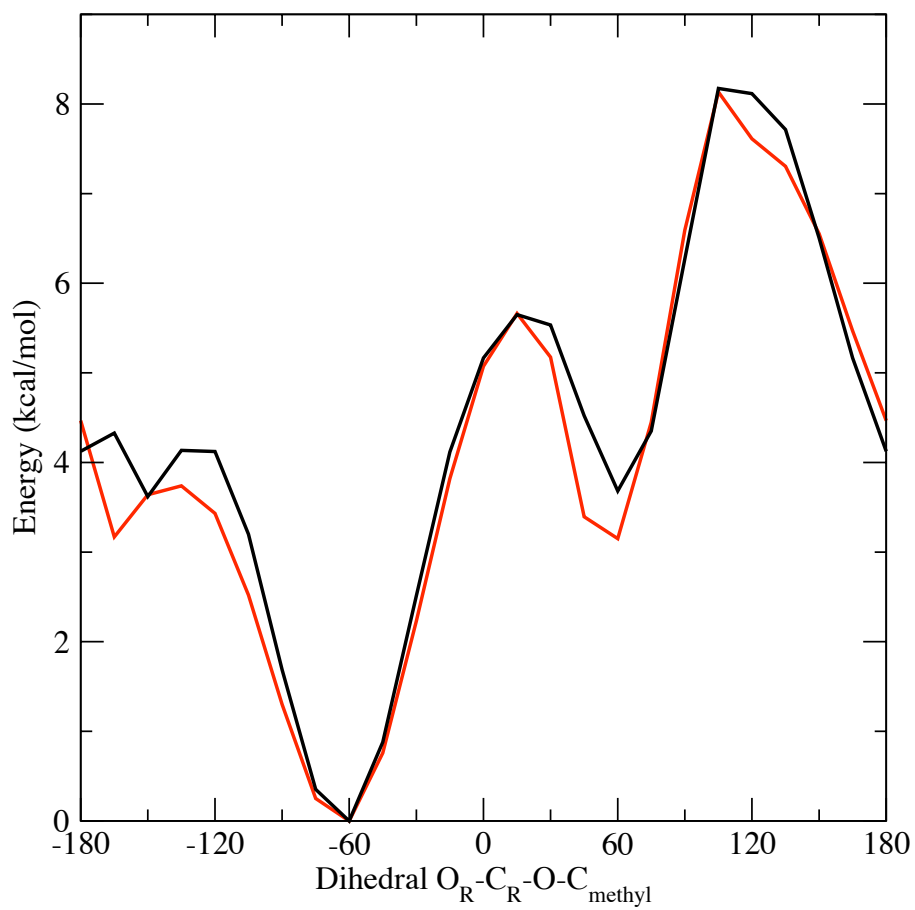

Figure S4. Time series of the pseudorotation rotation of 1 molecule of  $\alpha$ -arabinofuranose from solution simulations.

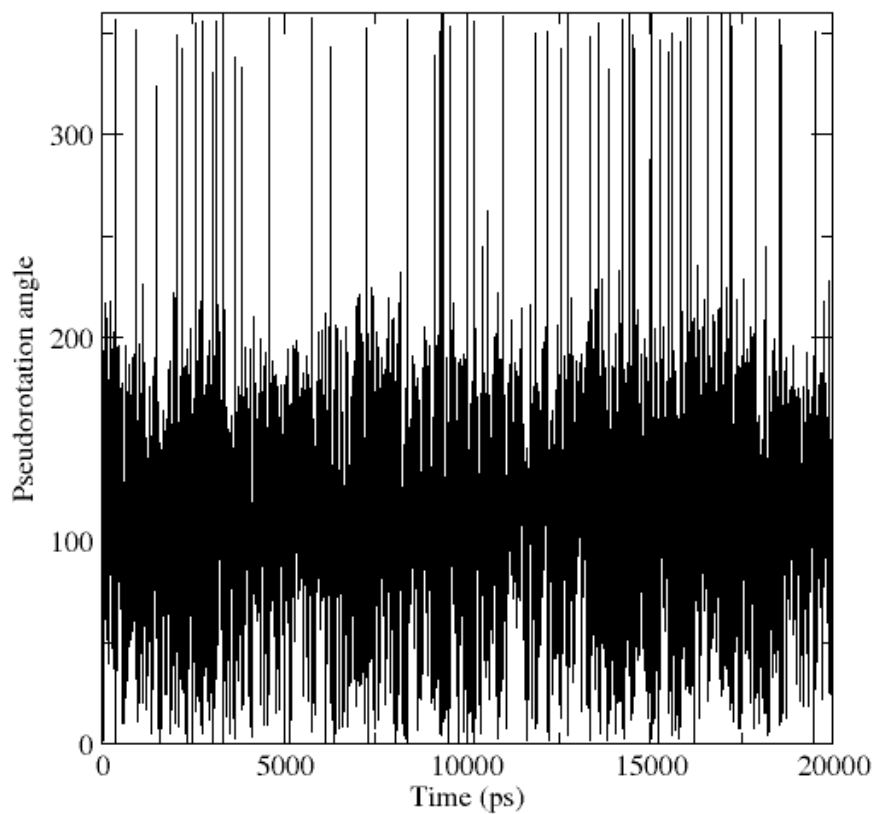

Figure S5. Histogram of the pseudorotation angle of the aldopentofuranoses from solution simulations. The distributions are normalized to one.

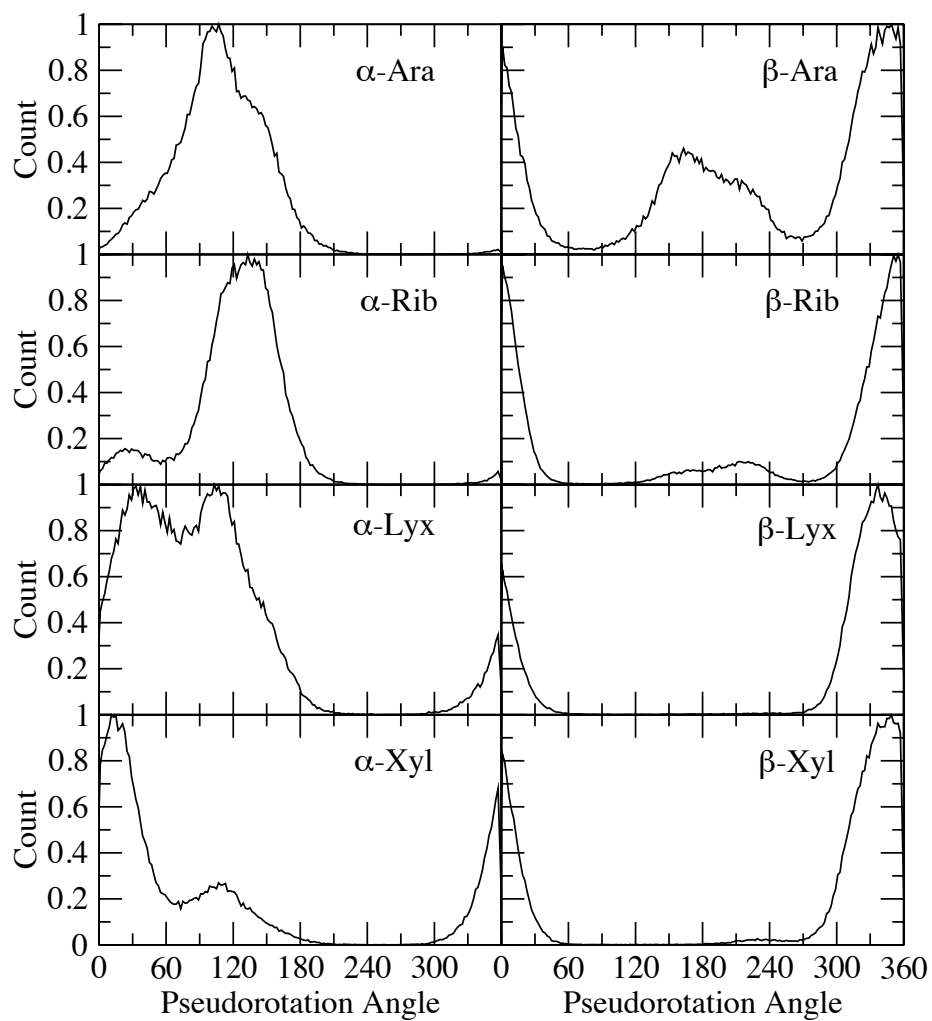

## References:

- (1) Humphrey, W.; Dalke, A.; Schulten, K. *J. Mol. Graph.* **1996**, *14*, 33.
- (2) Scott, A. P.; Radom, L. *J. Phys. Chem.* **1996**, *100*, 16502.
- (3) Pulay, P.; Fogarasi, G.; Pang, F.; Boggs, J. E. *J. Am. Chem. Soc.* **1979**, *101*, 2550.



Table S7. Topology file for furanose compounds

\* \$Id: top\_allxx\_sugar.inp,v 1.79 2009-05-07 01:31:31 oguvench Exp \$  
 \* Topology file for carbohydrates  
 \* IC coordinates are for thermalized structures  
 \* Guvench, Hatcher, Greene, and MacKerell  
 \*  
 32 1

MASS 18 CC331 12.01100 C ! generic acyclic CH3 carbon  
 MASS 25 HCA3 1.00800 H ! aliphatic proton, CH3  
 MASS 33 OC301 15.99940 O ! generic linear ether  
 MASS 91 OC3C51 15.99940 O ! furan ring oxygen  
 MASS 92 CC3152 12.01100 C ! furan ring carbon  
 MASS 93 CC3153 12.01100 C ! furan ring carbon  
 MASS 94 CC3251 12.01100 C ! furan ring carbon; C2 deoxy  
 MASS 95 CC3151 12.01100 C ! furan ring carbon  
 MASS 96 CC3051 12.01100 C ! furan ring carbon; C2 fructose

AUTOGENERATE angles dihedrals  
 ! DEFAlts for patching FIRSt and LAST residues  
 DEFA FIRS NONE LAST NONE

RESI ADEO 0.0 ! alpha-Deoxy-Ribose  
 GROUP

|          |        |       |   |  |  |  |  |
|----------|--------|-------|---|--|--|--|--|
| ATOM 04  | OC3C51 | -0.40 | ! |  |  |  |  |
| ATOM C1  | CC3152 | 0.34  | ! |  |  |  |  |
| ATOM H1  | HCA1   | 0.09  | ! |  |  |  |  |
| ATOM 01  | OC311  | -0.65 | ! |  |  |  |  |
| ATOM H01 | HCP1   | 0.42  | ! |  |  |  |  |
| ATOM C4  | CC3153 | 0.11  | ! |  |  |  |  |
| ATOM H4  | HCA1   | 0.09  | ! |  |  |  |  |
| GROUP    |        |       | ! |  |  |  |  |
| ATOM C5  | CC321  | 0.05  | ! |  |  |  |  |
| ATOM H51 | HCA2   | 0.09  | ! |  |  |  |  |
| ATOM H52 | HCA2   | 0.09  | ! |  |  |  |  |
| ATOM 05  | OC311  | -0.65 | ! |  |  |  |  |
| ATOM H05 | HCP1   | 0.42  | ! |  |  |  |  |
| GROUP    |        |       | ! |  |  |  |  |
| ATOM C2  | CC3251 | -0.18 | ! |  |  |  |  |
| ATOM H21 | HCA2   | 0.09  | ! |  |  |  |  |
| ATOM H22 | HCA2   | 0.09  | ! |  |  |  |  |
| GROUP    |        |       | ! |  |  |  |  |
| ATOM C3  | CC3151 | 0.14  | ! |  |  |  |  |
| ATOM H3  | HCA1   | 0.09  | ! |  |  |  |  |
| ATOM 03  | OC311  | -0.65 | ! |  |  |  |  |
| ATOM H03 | HCP1   | 0.42  | ! |  |  |  |  |

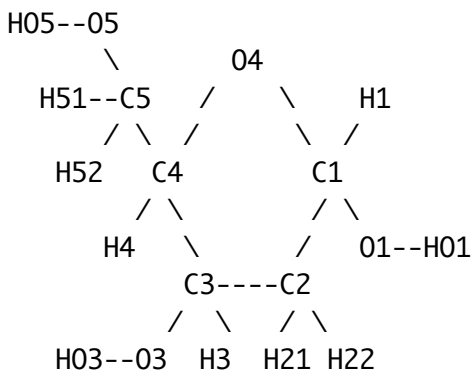

BOND 04 C1 C1 H1 C1 01 H01

```

BOND C1 C2 C2 H21 C2 H22 C2 C3
BOND C3 H3 C3 O3 O3 H03 C3 C4
BOND C4 H4 C4 O4 C4 C5 C5 H51
BOND C5 H52 C5 O5 O5 H05
IC C4 O4 C1 C2 1.4309 108.67 -19.01 106.25 1.5278
IC O4 C1 C2 C3 1.4258 106.25 -8.82 103.23 1.5178
IC C1 C2 C3 C4 1.5278 103.23 31.05 101.83 1.5232
IC C3 O4 *C4 C5 1.5232 101.44 124.05 113.01 1.5448
IC C3 O4 *C4 H4 1.5232 101.44 -115.42 106.74 1.1134
IC O4 C4 C5 O5 1.4309 113.01 -178.27 111.12 1.4304
IC C4 C5 O5 H05 1.5448 111.12 -87.73 110.40 0.9643
IC O4 C4 *C5 H51 2.4824 32.04 59.71 109.84 1.1020
IC O4 C4 *C5 H52 2.4824 32.04 -58.37 108.86 1.1027
IC C2 O4 *C1 O1 1.5278 106.25 119.87 110.66 1.3905
IC O4 C1 O1 H01 1.4258 110.66 60.11 106.63 0.9584
IC C2 O4 *C1 H1 1.5278 106.25 -119.86 107.45 1.1137
IC C3 C1 *C2 H21 1.5178 103.23 118.42 111.24 1.1030
IC C3 C1 *C2 H22 1.5178 103.23 -122.05 112.95 1.0962
IC C2 C4 *C3 O3 1.5178 101.83 -120.07 112.49 1.4116
IC C4 C3 O3 H03 1.5232 112.49 -53.93 107.21 0.9673
IC C2 C4 *C3 H3 1.5178 101.83 117.41 109.93 1.1144

```

```
RESI BDEO 0.0 ! beta-Deoxy-Ribose
```

```

ATOM O4 OC3C51 -0.40 !
ATOM C1 CC3152 0.34 !
ATOM H1 HCA1 0.09 !
ATOM O1 OC311 -0.65 !
ATOM H01 HCP1 0.42 !
ATOM C4 CC3153 0.11 !
ATOM H4 HCA1 0.09 !
GROUP !
ATOM C5 CC321 0.05 !
ATOM H51 HCA2 0.09 !
ATOM H52 HCA2 0.09 !
ATOM O5 OC311 -0.65 !
ATOM H05 HCP1 0.42 !
GROUP !
ATOM C2 CC3251 -0.18 !
ATOM H21 HCA2 0.09 !
ATOM H22 HCA2 0.09 !
GROUP !
ATOM C3 CC3151 0.14 !
ATOM H3 HCA1 0.09 !
ATOM O3 OC311 -0.65 !
ATOM H03 HCP1 0.42 !

```

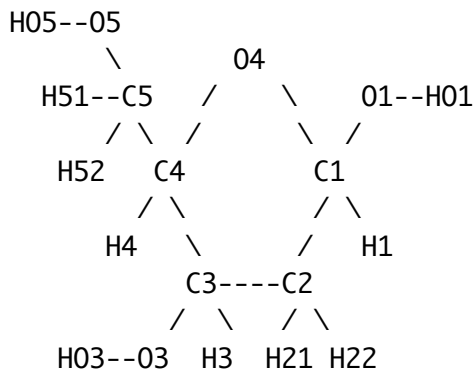

```

BOND O4 C1 C1 H1 C1 O1 O1 H01
BOND C1 C2 C2 H21 C2 H22 C2 C3

```

```

BOND C3 H3  C3 O3  O3 H03  C3 C4
BOND C4 H4  C4 O4  C4 C5  C5 H51
BOND C5 H52  C5 O5  O5 H05
IC C4  O4  C1  C2  1.4309  108.67  -19.01  106.25  1.5278
IC O4  C1  C2  C3  1.4258  106.25  -8.82  103.23  1.5178
IC C1  C2  C3  C4  1.5278  103.23  31.05  101.83  1.5232
IC C3  O4  *C4  C5  1.5232  101.44  124.05  113.01  1.5448
IC C3  O4  *C4  H4  1.5232  101.44  -115.42  106.74  1.1134
IC O4  C4  C5  O5  1.4309  113.01  -178.27  111.12  1.4304
IC C4  C5  O5  H05  1.5448  111.12  -87.73  110.40  0.9643
IC O4  C4  *C5  H51  2.4824  32.04  59.71  109.84  1.1020
IC O4  C4  *C5  H52  2.4824  32.04  -58.37  108.86  1.1027
IC C2  O4  *C1  O1  1.5278  106.25  -119.87  110.66  1.3905
IC O4  C1  O1  H01  1.4258  110.66  60.11  106.63  0.9584
IC C2  O4  *C1  H1  1.5278  106.25  119.86  107.45  1.1137
IC C3  C1  *C2  H21  1.5178  103.23  118.42  111.24  1.1030
IC C3  C1  *C2  H22  1.5178  103.23  -122.05  112.95  1.0962
IC C2  C4  *C3  O3  1.5178  101.83  -120.07  112.49  1.4116
IC C4  C3  O3  H03  1.5232  112.49  -53.93  107.21  0.9673
IC C2  C4  *C3  H3  1.5178  101.83  117.41  109.93  1.1144

```

```

RESI ARIB          0.0 ! alpha-Ribose
GROUP

```

```

ATOM O4  OC3C51 -0.40 !
ATOM C1  CC3152  0.34 !
ATOM H1  HCA1   0.09 !
ATOM O1  OC311  -0.65 !
ATOM H01 HCP1   0.42 !
ATOM C4  CC3153  0.11 !
ATOM H4  HCA1   0.09 !
GROUP
ATOM C5  CC321  0.05 !
ATOM H51 HCA2   0.09 !
ATOM H52 HCA2   0.09 !
ATOM O5  OC311  -0.65 !
ATOM H05 HCP1   0.42 !
GROUP
ATOM C2  CC3151  0.14 !
ATOM H2  HCA1   0.09 !
ATOM O2  OC311  -0.65 !
ATOM H02 HCP1   0.42 !
GROUP
ATOM C3  CC3151  0.14 !
ATOM H3  HCA1   0.09 !
ATOM O3  OC311  -0.65 !
ATOM H03 HCP1   0.42 !
BOND O4 C1  C1 H1  C1 O1  O1 H01

```

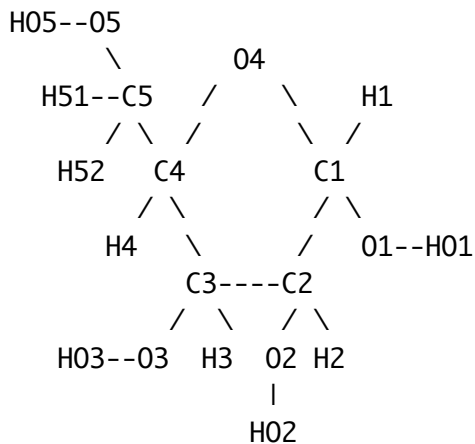

```

BOND C1 C2 C2 H2 C2 O2 O2 H02
BOND C2 C3 C3 H3 C3 O3 O3 H03
BOND C3 C4 C4 H4 C4 O5 C4 O4
BOND C5 H51 C5 H52 C5 O5 O5 H05
IC C4 O4 C1 C2 1.4343 107.06 -43.51 102.91 1.5564
IC O4 C1 C2 C3 1.4227 102.91 29.68 103.27 1.5615
IC C1 C2 C3 C4 1.5564 103.27 -6.90 103.97 1.5386
IC C3 O4 *C4 C5 1.5386 104.85 125.17 112.30 1.5446
IC C3 O4 *C4 H4 1.5386 104.85 -116.42 106.12 1.1143
IC O4 C4 C5 O5 1.4343 112.30 -178.59 110.88 1.4293
IC C4 C5 O5 H05 1.5446 110.88 -86.85 110.49 0.9639
IC O5 C4 *C5 H51 1.4293 110.88 119.78 108.95 1.1027
IC O5 C4 *C5 H52 1.4293 110.88 -122.02 109.96 1.1020
IC C2 O4 *C1 O1 1.5564 102.91 122.54 109.76 1.4025
IC O4 C1 O1 H01 1.4227 109.76 66.79 107.33 0.9584
IC C2 O4 *C1 H1 1.5564 102.91 -117.68 108.69 1.1117
IC C3 C1 *C2 H2 1.5615 103.27 -113.35 106.87 1.1124
IC C3 C1 *C2 O2 1.5615 103.27 127.46 116.16 1.4278
IC C1 C2 O2 H02 1.5564 116.16 -81.77 106.00 0.9665
IC C2 C4 *C3 O3 1.5615 103.97 -125.04 111.07 1.4263
IC C2 C4 *C3 H3 1.5615 103.97 115.28 109.94 1.1126
IC C4 C3 O3 H03 1.5386 111.07 -77.15 108.40 0.9644
IC C2 C4 *C3 H4 1.5615 103.97 -95.69 28.61 2.1867

```

```
RESI BRIB 0.0 ! beta-Ribose
```

```
GROUP
```

```

ATOM O4 OC3C51 -0.40 !
ATOM C1 CC3152 0.34 !
ATOM H1 HCA1 0.09 !
ATOM O1 OC311 -0.65 !
ATOM H01 HCP1 0.42 !
ATOM C4 CC3153 0.11 !
ATOM H4 HCA1 0.09 !
GROUP !
ATOM C5 CC321 0.05 !
ATOM H51 HCA2 0.09 !
ATOM H52 HCA2 0.09 !
ATOM O5 OC311 -0.65 !
ATOM H05 HCP1 0.42 !
GROUP !
ATOM C2 CC3151 0.14 !
ATOM H2 HCA1 0.09 !
ATOM O2 OC311 -0.65 !
ATOM H02 HCP1 0.42 !
GROUP !
ATOM C3 CC3151 0.14 !
ATOM H3 HCA1 0.09 !

```

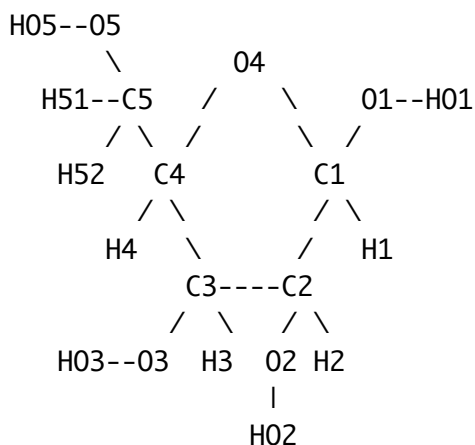

```

ATOM 03  OC311  -0.65  !
ATOM H03  HCP1   0.42  !
BOND 04  C1  C1  H1    C1 01    01  H01
BOND  C1  C2  C2  H2    C2 02    02  H02
BOND  C2  C3  C3  H3    C3 03    03  H03
BOND  C3  C4  C4  H4    C4 04    04  H04
BOND  C5  H51  C5  H52   C5 05    05  H05
IC  C4   04   C1   C2   1.4440  110.08   18.97  105.48   1.5227
IC  04   C1   C2   C3   1.4297  105.48  -35.29  101.04   1.5223
IC  C1   C2   C3   C4   1.5227  101.04   37.68  102.70   1.5258
IC  C3   04   *C4   C5   1.5258  105.50  121.77  111.20   1.4950
IC  C3   04   *C4   H4   1.5258  105.50 -118.83  108.63   0.9263
IC  04   C4   C5   05   1.4440  111.20   64.86  111.55   1.4236
IC  C4   C5   05   H05  1.4950  111.55 -127.57  107.69   0.8505
IC  05   C4   *C5   H51  1.4236  111.55 -124.94  108.14   0.9881
IC  05   C4   *C5   H52  1.4236  111.55  119.60  108.76   0.9311
IC  C2   04   *C1   01   1.5227  105.48 -116.55  111.30   1.3905
IC  04   C1   01   H01  1.4227  109.76   66.79  107.33   0.9584
IC  C2   04   *C1   H1   1.5227  105.48  122.60  106.81   0.9349
IC  C3   C1   *C2   H2   1.5223  101.04 -123.72  113.32   0.9736
IC  C3   C1   *C2   02   1.5223  101.04  114.67  111.40   1.4145
IC  C1   C2   02   H02  1.5227  111.40   80.30  105.08   0.8475
IC  C2   C4   *C3   03   1.5223  102.70 -122.33  110.28   1.4117
IC  C2   C4   *C3   H3   1.5223  102.70  114.19  111.24   0.9813
IC  C4   C3   03   H03  1.5258  110.28 -141.24  107.85   0.8418
IC  C2   C4   *C3   H4   1.5223  102.70  -89.81   25.03   2.0467

```

RESI AARB 0.0 ! alpha-Arabinose

GROUP

```

ATOM 04  OC3C51 -0.40  !
ATOM C1  CC3152 0.34  !
ATOM H1  HCA1   0.09  !
ATOM 01  OC311  -0.65  !
ATOM H01 HCP1   0.42  !
ATOM C4  CC3153 0.11  !
ATOM H4  HCA1   0.09  !
GROUP                                     !
ATOM C5  CC321  0.05  !
ATOM H51 HCA2   0.09  !
ATOM H52 HCA2   0.09  !
ATOM 05  OC311  -0.65  !
ATOM H05 HCP1   0.42  !
GROUP                                     !
ATOM C2  CC3151 0.14  !
ATOM H2  HCA1   0.09  !
ATOM 02  OC311  -0.65  !
ATOM H02 HCP1   0.42  !

```

```

GROUP !
ATOM C3 CC3151 0.14 !
ATOM H3 HCA1 0.09 !
ATOM O3 OC311 -0.65 !
ATOM H03 HCP1 0.42 !
BOND O4 C1 C1 H1 C1 O1 O1 H01
BOND C1 C2 C2 H2 C2 O2 O2 H02
BOND C2 C3 C3 H3 C3 O3 O3 H03
BOND C3 C4 C4 H4 C4 O5 C4 O4
BOND C5 H51 C5 H52 C5 O5 O5 H05
IC C4 O4 C1 C2 1.4306 107.10 -26.49 106.34 1.5438
IC O4 C1 C2 C3 1.4340 106.34 1.12 104.02 1.5260
IC C1 C2 C3 C4 1.5438 104.02 22.34 102.46 1.5303
IC C3 O4 *C4 C5 1.5303 103.09 123.36 110.44 1.5159
IC C3 O4 *C4 H4 1.5303 103.09 -115.64 113.85 1.0086
IC O4 C4 C5 O5 1.4306 110.44 -56.37 112.04 1.4264
IC C4 C5 O5 H05 1.5159 112.04 102.19 102.06 0.9067
IC O5 C4 *C5 H51 1.4264 112.04 127.49 104.59 0.9921
IC O5 C4 *C5 H52 1.4264 112.04 -122.48 106.02 1.0363
IC C2 O4 *C1 O1 1.5438 106.34 115.42 111.62 1.4003
IC O4 C1 O1 H01 1.4302 110.02 65.19 106.88 0.9590
IC C2 O4 *C1 H1 1.5438 106.34 -122.53 103.21 0.8654
IC C3 C1 *C2 H2 1.5260 104.02 116.77 107.88 0.9738
IC C3 C1 *C2 O2 1.5260 104.02 -125.34 114.46 1.4292
IC C1 C2 O2 H02 1.5438 114.46 76.69 114.36 0.8703
IC C2 C4 *C3 O3 1.5260 102.46 -119.30 112.98 1.4288
IC C2 C4 *C3 H3 1.5260 102.46 117.20 112.99 1.0436
IC C4 C3 O3 H03 1.5303 112.98 -92.09 109.45 0.8415
IC C2 C4 *C3 H4 1.5260 102.46 -81.75 27.82 2.0656

```

RESI BARB 0.0 ! beta-Arabinose

GROUP

```

ATOM O4 OC3C51 -0.40 !
ATOM C1 CC3152 0.34 !
ATOM H1 HCA1 0.09 !
ATOM O1 OC311 -0.65 !
ATOM H01 HCP1 0.42 !
ATOM C4 CC3153 0.11 !
ATOM H4 HCA1 0.09 !
GROUP !
ATOM C5 CC321 0.05 !
ATOM H51 HCA2 0.09 !
ATOM H52 HCA2 0.09 !
ATOM O5 OC311 -0.65 !
ATOM H05 HCP1 0.42 !
GROUP !
ATOM C2 CC3151 0.14 !

```

H05--O5  
 \            O4  
 H51--C5 /     \     H1  
 / \ /        \ /  
 H52 C4        C1  
 / \            / \  
 H4     \        /     O1--H01  
          C3----C2  
         / \     / \  
 H03--O3 H3 H2 O2  
                  |  
                  H02

|             |        |       |        |                    |         |        |        |         |    |  |  |
|-------------|--------|-------|--------|--------------------|---------|--------|--------|---------|----|--|--|
| ATOM H2     | HCA1   | 0.09  | !      |                    |         |        |        |         |    |  |  |
| ATOM O2     | OC311  | -0.65 | !      |                    |         |        |        |         |    |  |  |
| ATOM H02    | HCP1   | 0.42  | !      |                    |         |        |        |         |    |  |  |
| GROUP       |        |       | !      |                    |         |        |        |         |    |  |  |
| ATOM C3     | CC3151 | 0.14  | !      |                    |         |        |        |         |    |  |  |
| ATOM H3     | HCA1   | 0.09  | !      |                    |         |        |        |         |    |  |  |
| ATOM O3     | OC311  | -0.65 | !      |                    |         |        |        |         |    |  |  |
| ATOM H03    | HCP1   | 0.42  | !      |                    |         |        |        |         |    |  |  |
| BOND O4 C1  | C1 H1  | C1 O1 | O1 H01 |                    |         |        |        |         |    |  |  |
| BOND C1 C2  | C2 H2  | C2 O2 | O2 H02 |                    |         |        |        |         |    |  |  |
| BOND C2 C3  | C3 H3  | C3 O3 | O3 H03 |                    |         |        |        |         |    |  |  |
| BOND C3 C4  | C4 H4  | C4 C5 | C4 O4  |                    |         |        |        |         |    |  |  |
| BOND C5 H51 | C5 H52 | C5 O5 | O5 H05 |                    |         |        |        |         |    |  |  |
| IC C4       | O4 C1  | C2    | 1.4548 | 108.97             | 34.73   | 103.97 | 1.5359 |         |    |  |  |
| IC O4       | C1 C2  | C3    | 1.4109 | 103.97             | -41.14  | 100.87 | 1.5393 |         |    |  |  |
| IC C1       | C2 C3  | C4    | 1.5359 | 100.87             | 31.90   | 103.23 | 1.5403 |         |    |  |  |
| IC C3       | O4 *C4 | C5    | 1.5403 | 106.18             | 122.06  | 111.54 | 1.5130 |         |    |  |  |
| IC C3       | O4 *C4 | H4    | 1.5403 | 106.18             | -117.66 | 107.50 | 1.1035 |         |    |  |  |
| IC O4       | C4 C5  | O5    | 1.4548 | 111.54             | 73.00   | 112.71 | 1.4167 |         |    |  |  |
| IC C4       | C5 O5  | H05   | 1.5130 | 112.71             | -63.34  | 111.90 | 0.9759 |         |    |  |  |
| IC O5       | C4 *C5 | H51   | 1.4167 | 112.71             | 118.93  | 109.63 | 1.0973 |         |    |  |  |
| IC O5       | C4 *C5 | H52   | 1.4167 | 112.71             | -123.60 | 108.79 | 1.1016 |         |    |  |  |
| IC C2       | O4 *C1 | O1    | 1.5359 | 103.97             | -116.48 | 112.55 | 1.4080 |         |    |  |  |
| IC O4       | C1 O1  | H01   | 1.4302 | 110.02             | 65.19   | 106.88 | 0.9590 |         |    |  |  |
| IC C2       | O4 *C1 | H1    | 1.5359 | 103.97             | 122.08  | 107.20 | 1.1084 |         |    |  |  |
| IC C3       | C1 *C2 | H2    | 1.5393 | 100.87             | 114.97  | 107.92 | 1.0994 |         |    |  |  |
| IC C3       | C1 *C2 | O2    | 1.5393 | 100.87             | -123.41 | 116.28 | 1.4042 |         |    |  |  |
| IC C1       | C2 O2  | H02   | 1.5359 | 116.28             | 69.52   | 111.91 | 0.9792 |         |    |  |  |
| IC C2       | C4 *C3 | O3    | 1.5393 | 103.23             | -122.92 | 110.55 | 1.4162 |         |    |  |  |
| IC C2       | C4 *C3 | H3    | 1.5393 | 103.23             | 114.63  | 110.37 | 1.0999 |         |    |  |  |
| IC C4       | C3 O3  | H03   | 1.5403 | 110.55             | -146.15 | 107.12 | 0.9899 |         |    |  |  |
| IC C2       | C4 *C3 | H4    | 1.5393 | 103.23             | -103.11 | 28.42  | 2.1796 |         |    |  |  |
| RESI ALYF   |        | 0.0   | !      | alpha-Lyxofuranose |         |        |        |         |    |  |  |
| GROUP       |        |       |        |                    |         |        |        |         |    |  |  |
| ATOM O4     | OC3C51 | -0.40 | !      |                    |         |        |        |         |    |  |  |
| ATOM C1     | CC3152 | 0.34  | !      |                    |         |        |        |         |    |  |  |
| ATOM H1     | HCA1   | 0.09  | !      |                    | H05--O5 |        |        |         |    |  |  |
| ATOM O1     | OC311  | -0.65 | !      |                    | \       | O4     |        |         |    |  |  |
| ATOM H01    | HCP1   | 0.42  | !      |                    | H51--C5 | /      | \      | H1      |    |  |  |
| ATOM C4     | CC3153 | 0.11  | !      |                    | /       | \      | /      | \       | /  |  |  |
| ATOM H4     | HCA1   | 0.09  | !      |                    | H52     | C4     |        | C1      |    |  |  |
| GROUP       |        |       | !      |                    | /       | \      |        | /       | \  |  |  |
| ATOM C5     | CC321  | 0.05  | !      |                    | H4      | \      | /      | O1--H01 |    |  |  |
| ATOM H51    | HCA2   | 0.09  | !      |                    |         | C3---- | C2     |         |    |  |  |
| ATOM H52    | HCA2   | 0.09  | !      |                    |         | /      | \      | /       | \  |  |  |
| ATOM O5     | OC311  | -0.65 | !      |                    |         | H3     | O3     | H2      | O2 |  |  |

```

ATOM H05  HCP1    0.42  !
GROUP
ATOM C2   CC3151  0.14  !
ATOM H2   HCA1    0.09  !
ATOM O2   OC311  -0.65  !
ATOM H02  HCP1    0.42  !
GROUP
ATOM C3   CC3151  0.14  !
ATOM H3   HCA1    0.09  !
ATOM O3   OC311  -0.65  !
ATOM H03  HCP1    0.42  !
BOND O4 C1 C1 H1 C1 O1 O1 H01
BOND C1 C2 C2 H2 C2 O2 O2 H02
BOND C2 C3 C3 H3 C3 O3 O3 H03
BOND C3 C4 C4 H4 C4 C5 C4 O4
BOND C5 H51 C5 H52 C5 O5 O5 H05
IC C4 O4 C1 C2 1.4508 108.66 -7.71 105.45 1.5350
IC O4 C1 C2 C3 1.4423 105.45 -20.33 103.34 1.5260
IC C1 C2 C3 C4 1.5350 103.34 38.67 99.49 1.5213
IC C3 O4 *C4 C5 1.5213 103.18 123.49 110.50 1.5094
IC C3 O4 *C4 H4 1.5213 103.18 -116.37 110.06 0.9177
IC O4 C4 C5 O5 1.4508 110.50 64.45 111.91 1.4362
IC C4 C5 O5 H05 1.5094 111.91 -100.83 106.52 0.8229
IC O5 C4 *C5 H51 1.4362 111.91 -122.96 111.22 0.9610
IC O5 C4 *C5 H52 1.4362 111.91 118.00 105.92 0.9981
IC C2 O4 *C1 O1 1.5350 105.45 117.18 111.33 1.3990
IC O4 C1 O1 H01 1.4298 109.95 66.51 107.28 0.9594
IC C2 O4 *C1 H1 1.5350 105.45 -122.79 104.35 0.9461
IC C3 C1 *C2 H2 1.5260 103.34 114.87 109.77 0.9507
IC C3 C1 *C2 O2 1.5260 103.34 -124.11 111.80 1.4233
IC C1 C2 O2 H02 1.5350 111.80 -137.09 106.49 0.8342
IC C2 C4 *C3 O3 1.5260 99.49 115.69 108.16 1.4208
IC C2 C4 *C3 H3 1.5260 99.49 -120.13 112.07 0.9599
IC C4 C3 O3 H03 1.5213 108.16 166.83 108.82 0.7802
IC C2 C4 *C3 H4 1.5260 99.49 -73.23 25.44 2.0181
RESI BLYF 0.0 ! beta-Lyxofuranose
GROUP
ATOM O4 OC3C51 -0.40 !
ATOM C1 CC3152 0.34 !
ATOM H1 HCA1 0.09 !
ATOM O1 OC311 -0.65 !
ATOM H01 HCP1 0.42 !
ATOM C4 CC3153 0.11 !
ATOM H4 HCA1 0.09 !
GROUP
ATOM C5 CC321 0.05 !

```

```

H05--O5
  \
H51--C5 / \ H1
  / \ / \ /
H52 C4 C1
  / \ / \
H4 \ / \ O1--H01

```





ATOM H4 HCA1 0.09 !  
 GROUP !  
 ATOM C5 CC321 0.05 !  
 ATOM H51 HCA2 0.09 !  
 ATOM H52 HCA2 0.09 !  
 ATOM O5 OC311 -0.65 !  
 ATOM H05 HCP1 0.42 !  
 GROUP !  
 ATOM C2 CC3151 0.14 !  
 ATOM H2 HCA1 0.09 !  
 ATOM O2 OC311 -0.65 !  
 ATOM H02 HCP1 0.42 !  
 GROUP !  
 ATOM C3 CC3151 0.14 !  
 ATOM H3 HCA1 0.09 !  
 ATOM O3 OC311 -0.65 !  
 ATOM H03 HCP1 0.42 !

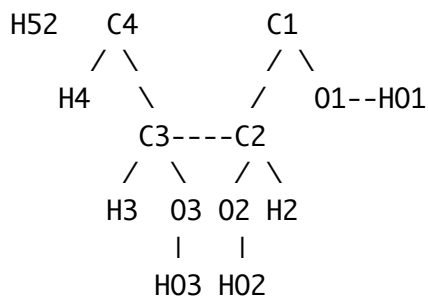

BOND O4 C1 C1 H1 C1 O1 O1 H01  
 BOND C1 C2 C2 H2 C2 O2 O2 H02  
 BOND C2 C3 C3 H3 C3 O3 O3 H03  
 BOND C3 C4 C4 H4 C4 C5 C4 O4  
 BOND C5 H51 C5 H52 C5 O5 O5 H05

|       |    |     |     |        |        |         |        |        |
|-------|----|-----|-----|--------|--------|---------|--------|--------|
| IC C4 | O4 | C1  | C2  | 1.4499 | 110.14 | -28.22  | 104.00 | 1.5265 |
| IC O4 | C1 | C2  | C3  | 1.4186 | 104.00 | 40.39   | 101.04 | 1.5264 |
| IC C1 | C2 | C3  | C4  | 1.5265 | 101.04 | -36.87  | 102.46 | 1.5422 |
| IC C3 | O4 | *C4 | C5  | 1.5422 | 105.44 | 125.67  | 107.30 | 1.5196 |
| IC C3 | O4 | *C4 | H4  | 1.5422 | 105.44 | -122.50 | 107.03 | 0.9837 |
| IC O4 | C4 | C5  | O5  | 1.4499 | 107.30 | -67.21  | 114.12 | 1.4235 |
| IC C4 | C5 | O5  | H05 | 1.5196 | 114.12 | 69.48   | 106.22 | 0.7593 |
| IC O5 | C4 | *C5 | H51 | 1.4235 | 114.12 | -117.13 | 109.10 | 0.9433 |
| IC O5 | C4 | *C5 | H52 | 1.4235 | 114.12 | 125.77  | 106.78 | 0.9482 |
| IC C2 | O4 | *C1 | O1  | 1.5265 | 104.00 | 116.88  | 112.60 | 1.4045 |
| IC O4 | C1 | O1  | H01 | 1.4288 | 110.19 | 60.16   | 106.38 | 0.9603 |
| IC C2 | O4 | *C1 | H1  | 1.5265 | 104.00 | -124.86 | 106.28 | 0.9211 |
| IC C3 | C1 | *C2 | H2  | 1.5264 | 101.04 | -115.23 | 105.83 | 0.9677 |
| IC C3 | C1 | *C2 | O2  | 1.5264 | 101.04 | 124.69  | 114.86 | 1.4186 |
| IC C1 | C2 | O2  | H02 | 1.5265 | 114.86 | -77.13  | 109.68 | 0.7338 |
| IC C2 | C4 | *C3 | O3  | 1.5264 | 102.46 | 123.87  | 113.27 | 1.4234 |
| IC C2 | C4 | *C3 | H3  | 1.5264 | 102.46 | -112.51 | 113.63 | 0.9361 |
| IC C4 | C3 | O3  | H03 | 1.5422 | 113.27 | 154.10  | 106.17 | 0.8221 |
| IC C2 | C4 | *C3 | H4  | 1.5264 | 102.46 | -138.78 | 24.60  | 2.1476 |

RESI BXYP 0.0 ! beta-Xylofuranose  
 GROUP

ATOM O4 OC3C51 -0.40 !  
 ATOM C1 CC3152 0.34 !  
 ATOM H1 HCA1 0.09 !

H05--05

|           |        |       |     |        |                      |         |        |        |
|-----------|--------|-------|-----|--------|----------------------|---------|--------|--------|
| ATOM 01   | OC311  | -0.65 | !   |        |                      |         |        |        |
| ATOM H01  | HCP1   | 0.42  | !   |        |                      |         |        |        |
| ATOM C4   | CC3153 | 0.11  | !   |        |                      |         |        |        |
| ATOM H4   | HCA1   | 0.09  | !   |        |                      |         |        |        |
| GROUP     |        |       | !   |        |                      |         |        |        |
| ATOM C5   | CC321  | 0.05  | !   |        |                      |         |        |        |
| ATOM H51  | HCA2   | 0.09  | !   |        |                      |         |        |        |
| ATOM H52  | HCA2   | 0.09  | !   |        |                      |         |        |        |
| ATOM 05   | OC311  | -0.65 | !   |        |                      |         |        |        |
| ATOM H05  | HCP1   | 0.42  | !   |        |                      |         |        |        |
| GROUP     |        |       | !   |        |                      |         |        |        |
| ATOM C2   | CC3151 | 0.14  | !   |        |                      |         |        |        |
| ATOM H2   | HCA1   | 0.09  | !   |        |                      |         |        |        |
| ATOM 02   | OC311  | -0.65 | !   |        |                      |         |        |        |
| ATOM H02  | HCP1   | 0.42  | !   |        |                      |         |        |        |
| GROUP     |        |       | !   |        |                      |         |        |        |
| ATOM C3   | CC3151 | 0.14  | !   |        |                      |         |        |        |
| ATOM H3   | HCA1   | 0.09  | !   |        |                      |         |        |        |
| ATOM 03   | OC311  | -0.65 | !   |        |                      |         |        |        |
| ATOM H03  | HCP1   | 0.42  | !   |        |                      |         |        |        |
| BOND 04   | C1     | C1    | H1  | C1     | 01                   | 01      | H01    |        |
| BOND C1   | C2     | C2    | H2  | C2     | 02                   | 02      | H02    |        |
| BOND C2   | C3     | C3    | H3  | C3     | 03                   | 03      | H03    |        |
| BOND C3   | C4     | C4    | H4  | C4     | C5                   | C4      | O4     |        |
| BOND C5   | H51    | C5    | H52 | C5     | O5                   | O5      | H05    |        |
| IC C4     | O4     | C1    | C2  | 1.4368 | 109.21               | 7.17    | 106.92 | 1.5609 |
| IC O4     | C1     | C2    | C3  | 1.4288 | 106.92               | -29.31  | 100.61 | 1.5256 |
| IC C1     | C2     | C3    | C4  | 1.5609 | 100.61               | 38.33   | 101.22 | 1.5366 |
| IC C3     | O4     | *C4   | C5  | 1.5366 | 105.95               | 126.07  | 111.10 | 1.5466 |
| IC C3     | O4     | *C4   | H4  | 1.5366 | 105.95               | -115.62 | 106.41 | 1.1129 |
| IC O4     | C4     | C5    | O5  | 1.4368 | 111.10               | -170.12 | 111.17 | 1.4292 |
| IC C4     | C5     | O5    | H05 | 1.5466 | 111.17               | -86.81  | 110.69 | 0.9637 |
| IC O5     | C4     | *C5   | H51 | 1.4292 | 111.17               | 119.44  | 108.73 | 1.1031 |
| IC O5     | C4     | *C5   | H52 | 1.4292 | 111.17               | -122.76 | 110.12 | 1.1017 |
| IC C2     | O4     | *C1   | O1  | 1.5609 | 106.92               | -123.12 | 110.19 | 1.4024 |
| IC O4     | C1     | O1    | H01 | 1.4288 | 110.19               | 60.16   | 106.38 | 0.9603 |
| IC C2     | O4     | *C1   | H1  | 1.5609 | 106.92               | 117.24  | 106.84 | 1.1130 |
| IC C3     | C1     | *C2   | H2  | 1.5256 | 100.61               | -119.80 | 111.22 | 1.1086 |
| IC C3     | C1     | *C2   | O2  | 1.5256 | 100.61               | 116.99  | 113.84 | 1.4299 |
| IC C1     | C2     | O2    | H02 | 1.5609 | 113.84               | 25.15   | 106.11 | 0.9678 |
| IC C2     | C4     | *C3   | O3  | 1.5256 | 101.22               | 116.82  | 111.32 | 1.4223 |
| IC C2     | C4     | *C3   | H3  | 1.5256 | 101.22               | -120.45 | 112.39 | 1.1104 |
| IC C4     | C3     | O3    | H03 | 1.5366 | 111.32               | 68.17   | 107.50 | 0.9664 |
| IC C2     | C4     | *C3   | H4  | 1.5256 | 101.22               | -77.82  | 29.09  | 2.1676 |
| RESI AFRU |        |       | 0.0 | !      | alpha-Fructofuranose |         |        |        |
| GROUP     |        |       |     |        |                      |         |        |        |

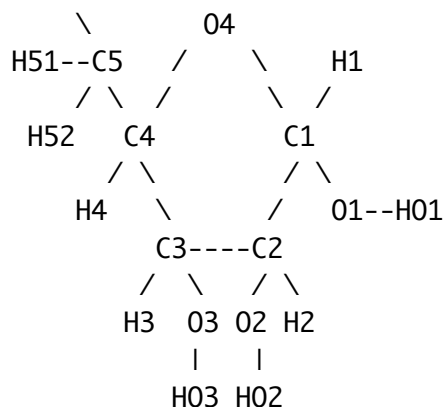

ATOM O5 OC3C51 -0.40 !  
 ATOM C2 CC3051 0.43 !  
 ATOM O2 OC311 -0.65 !  
 ATOM H02 HCP1 0.42 !  
 ATOM C5 CC3153 0.11 !  
 ATOM H5 HCA1 0.09 !  
 GROUP !  
 ATOM C6 CC321 0.05 !  
 ATOM H61 HCA2 0.09 !  
 ATOM H62 HCA2 0.09 !  
 ATOM O6 OC311 -0.65 !  
 ATOM H06 HCP1 0.42 !  
 GROUP !  
 ATOM C1 CC321 0.05 !  
 ATOM H11 HCA2 0.09 !  
 ATOM H12 HCA2 0.09 !  
 ATOM O1 OC311 -0.65 !  
 ATOM H01 HCP1 0.42 !  
 GROUP !  
 ATOM C3 CC3151 0.14 !  
 ATOM H3 HCA1 0.09 !  
 ATOM O3 OC311 -0.65 !  
 ATOM H03 HCP1 0.42 !  
 GROUP !  
 ATOM C4 CC3151 0.14 !  
 ATOM H4 HCA1 0.09 !  
 ATOM O4 OC311 -0.65 !  
 ATOM H04 HCP1 0.42 !

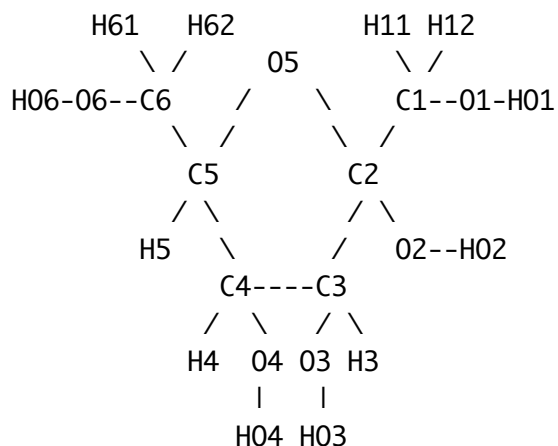

BOND O5 C2 C2 C1 C2 O2 O2 H02  
 BOND C2 C3 C3 H3 C3 O3 O3 H03  
 BOND C3 C4 C4 H4 C4 O4 O4 H04  
 BOND C4 C5 C5 H5 C5 C6 C5 O5  
 BOND C6 H61 C6 H62 C6 O6 O6 H06  
 BOND C1 H11 C1 H12 C1 O1 O1 H01

|    |    |    |     |     |        |        |         |        |        |
|----|----|----|-----|-----|--------|--------|---------|--------|--------|
| IC | C5 | O5 | C2  | C3  | 1.4395 | 110.18 | -3.87   | 105.48 | 1.5648 |
| IC | O5 | C2 | C3  | C4  | 1.4336 | 105.48 | -22.42  | 101.84 | 1.5306 |
| IC | C2 | C3 | C4  | C5  | 1.5648 | 101.84 | 38.32   | 100.70 | 1.5279 |
| IC | C4 | O5 | *C5 | C6  | 1.5279 | 103.59 | 125.05  | 112.69 | 1.5464 |
| IC | C4 | O5 | *C5 | H5  | 1.5279 | 103.59 | -115.88 | 106.71 | 1.1148 |
| IC | O5 | C5 | C6  | O6  | 1.4395 | 112.69 | 61.06   | 111.04 | 1.4266 |
| IC | C5 | C6 | O6  | H06 | 1.5464 | 111.04 | -54.34  | 109.23 | 0.9640 |
| IC | O6 | C5 | *C6 | H61 | 1.4266 | 111.04 | 120.13  | 109.35 | 1.1026 |
| IC | O6 | C5 | *C6 | H62 | 1.4266 | 111.04 | -121.07 | 109.82 | 1.1014 |
| IC | C3 | O5 | *C2 | O2  | 1.5648 | 105.48 | 118.28  | 109.92 | 1.4008 |
| IC | O5 | C2 | O2  | H02 | 1.4336 | 109.92 | 74.40   | 106.34 | 0.9587 |
| IC | C4 | C2 | *C3 | H3  | 1.5306 | 101.84 | 113.46  | 108.58 | 1.1157 |

|       |    |     |     |        |        |         |        |        |
|-------|----|-----|-----|--------|--------|---------|--------|--------|
| IC C4 | C2 | *C3 | 03  | 1.5306 | 101.84 | -124.07 | 116.26 | 1.4342 |
| IC C2 | C3 | 03  | H03 | 1.5648 | 116.26 | -110.77 | 108.92 | 0.9651 |
| IC C3 | C5 | *C4 | 04  | 1.5306 | 100.70 | -121.44 | 112.56 | 1.4204 |
| IC C3 | C5 | *C4 | H4  | 1.5306 | 100.70 | 116.39  | 109.75 | 1.1135 |
| IC C5 | C4 | 04  | H04 | 1.5279 | 112.56 | -173.27 | 109.31 | 0.9636 |
| IC C3 | C5 | *C4 | H5  | 1.5306 | 100.70 | -71.96  | 28.83  | 2.1752 |
| IC C5 | O5 | C2  | C1  | 1.4395 | 110.18 | -125.10 | 106.36 | 1.5716 |
| IC O5 | C2 | C1  | H11 | 1.4336 | 106.36 | 64.27   | 108.72 | 1.1000 |
| IC O5 | C2 | C1  | H12 | 1.4336 | 106.36 | -52.00  | 108.02 | 1.1012 |
| IC O5 | C2 | C1  | O1  | 1.4336 | 106.36 | -172.81 | 115.31 | 1.4354 |
| IC C2 | C1 | O1  | H01 | 1.5716 | 115.31 | -62.37  | 108.51 | 0.9672 |
| IC O1 | C2 | *C1 | H11 | 1.4354 | 115.31 | -122.91 | 108.72 | 1.1000 |
| IC O1 | C2 | *C1 | H12 | 1.4354 | 115.31 | 120.81  | 108.02 | 1.1012 |

RESI BFRU 0.0 ! beta-Fructofuranose

GROUP

ATOM O5 OC3C51 -0.40 !

ATOM C2 CC3O51 0.43 !

ATOM O2 OC311 -0.65 !

ATOM H02 HCP1 0.42 !

ATOM C5 CC3153 0.11 !

ATOM H5 HCA1 0.09 !

GROUP !

ATOM C6 CC321 0.05 !

ATOM H61 HCA2 0.09 !

ATOM H62 HCA2 0.09 !

ATOM O6 OC311 -0.65 !

ATOM H06 HCP1 0.42 !

GROUP !

ATOM C1 CC321 0.05 !

ATOM H11 HCA2 0.09 !

ATOM H12 HCA2 0.09 !

ATOM O1 OC311 -0.65 !

ATOM H01 HCP1 0.42 !

GROUP !

ATOM C3 CC3151 0.14 !

ATOM H3 HCA1 0.09 !

ATOM O3 OC311 -0.65 !

ATOM H03 HCP1 0.42 !

GROUP !

ATOM C4 CC3151 0.14 !

ATOM H4 HCA1 0.09 !

ATOM O4 OC311 -0.65 !

ATOM H04 HCP1 0.42 !

BOND O5 C2 C2 C1 C2 O2 O2 H02

BOND C2 C3 C3 H3 C3 O3 O3 H03

BOND C3 C4 C4 H4 C4 O4 O4 H04

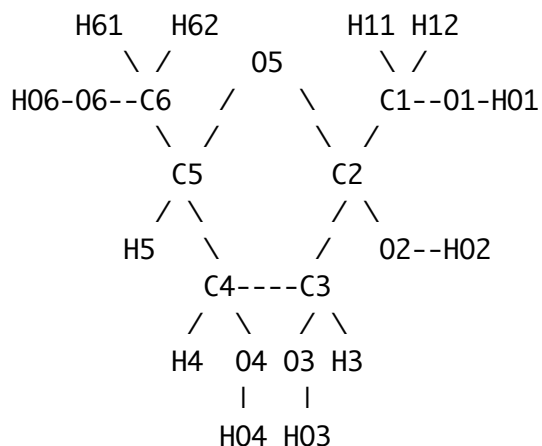

BOND C4 C5 C5 H5 C5 C6 C5 O5  
 BOND C6 H61 C6 H62 C6 O6 O6 H06  
 BOND C1 H11 C1 H12 C1 O1 O1 H01  
 IC C5 O5 C2 C3 1.4445 110.17 24.54 103.90 1.5535  
 IC O5 C2 C3 C4 1.4287 103.90 -39.46 100.37 1.5308  
 IC C2 C3 C4 C5 1.5535 100.37 38.82 101.99 1.5367  
 IC C4 O5 \*C5 C6 1.5367 106.18 125.52 112.09 1.5470  
 IC C4 O5 \*C5 H5 1.5367 106.18 -116.60 106.00 1.1142  
 IC O5 C5 C6 O6 1.4445 112.09 59.25 111.08 1.4266  
 IC C5 C6 O6 H06 1.5470 111.08 -58.47 108.57 0.9643  
 IC O6 C5 \*C6 H61 1.4266 111.08 120.33 109.39 1.1023  
 IC O6 C5 \*C6 H62 1.4266 111.08 -120.82 109.55 1.1021  
 IC C3 O5 \*C2 O2 1.5535 103.90 -118.22 109.18 1.4035  
 IC O5 C2 O2 H02 1.4287 109.18 159.12 104.91 0.9617  
 IC C4 C2 \*C3 H3 1.5308 100.37 114.40 108.58 1.1131  
 IC C4 C2 \*C3 O3 1.5308 100.37 -122.50 115.94 1.4351  
 IC C2 C3 O3 H03 1.5535 115.94 -76.65 108.79 0.9673  
 IC C3 C5 \*C4 O4 1.5308 101.99 -122.06 112.87 1.4204  
 IC C3 C5 \*C4 H4 1.5308 101.99 116.11 109.34 1.1142  
 IC C5 C4 O4 H04 1.5367 112.87 -177.81 108.59 0.9641  
 IC C3 C5 \*C4 H5 1.5308 101.99 -88.31 28.76 2.1807  
 IC C5 O5 C2 C1 1.4445 110.17 145.62 109.90 1.5622  
 IC O5 C2 C1 H11 1.4287 109.90 62.33 108.75 1.1018  
 IC O5 C2 C1 H12 1.4287 109.90 -54.09 107.90 1.1015  
 IC O5 C2 C1 O1 1.4287 109.90 -174.69 113.93 1.4392  
 IC C2 C1 O1 H01 1.5622 113.93 -99.33 109.99 0.9653  
 IC O1 C2 \*C1 H11 1.4392 113.93 -122.98 108.75 1.1018  
 IC O1 C2 \*C1 H12 1.4392 113.93 120.60 107.90 1.1015

PRES FOMEA 0.11 ! alpha 0-methyl to C1 on aldopentose  
 dele atom H01

ATOM C1 CC3152 0.29 !  
 ATOM O1 OC301 -0.36 !  
 ATOM CM CC331 -0.09 !  
 ATOM HM1 HCA3 0.09 !  
 ATOM HM2 HCA3 0.09 !  
 ATOM HM3 HCA3 0.09 !

BOND O1 CM

BOND CM HM1 CM HM2 CM HM3

IC O4 C1 O1 CM 1.4477 109.89 66.08 108.74 1.4244  
 IC C1 O1 CM HM1 1.4355 108.74 59.11 111.44 1.0883  
 IC HM1 O1 \*CM HM2 1.0883 111.44 119.69 113.64 1.0586  
 IC HM3 O1 \*CM HM2 1.1131 110.64 -122.99 113.64 1.0586

PRES FOMEB 0.11 ! beta 0-methyl to C1 on aldopentose  
 dele atom H01

ATOM C1 CC3152 0.29 !  
 ATOM O1 OC301 -0.36 !

```

ATOM CM    CC331    -0.09 !
ATOM HM1   HCA3     0.09 !
ATOM HM2   HCA3     0.09 !
ATOM HM3   HCA3     0.09 !
BOND O1 CM
BOND CM HM1  CM HM2  CM HM3
IC O4    C1  O1  CM  1.4138  114.30  -66.36  108.55  1.4077
IC C1    O1  CM  HM1  1.4353  108.55   41.11  109.39  1.0734
IC HM1   O1  *CM HM2  1.0734  109.39  129.90  119.45  1.0441
IC HM3   O1  *CM HM2  1.1148  107.24 -121.74  119.45  1.0441
END

```

Table S8.Parameter file for furanose compounds

\* \$Id: par\_allxx\_sugar.inp,v 1.106 2009-03-16 16:03:28 ehatcher Exp \$  
 \* Parameter file for furanose carbohydrates  
 \* Hatcher, Guvench, and MacKerell  
 \*

BONDS

|        |        |        |       |
|--------|--------|--------|-------|
| OC3C51 | CC3152 | 350.00 | 1.425 |
| OC3C51 | CC3051 | 350.00 | 1.425 |
| OC3C51 | CC3153 | 350.00 | 1.425 |
| OC311  | CC3152 | 428.00 | 1.395 |
| OC311  | CC3051 | 428.00 | 1.395 |
| OC311  | CC3151 | 410.00 | 1.395 |
| CC3152 | HCA1   | 309.00 | 1.111 |
| CC3251 | HCA2   | 307.00 | 1.100 |
| CC3151 | HCA1   | 309.00 | 1.111 |
| CC3153 | HCA1   | 309.00 | 1.111 |
| CC3152 | CC3251 | 195.00 | 1.508 |
| CC3051 | CC3251 | 195.00 | 1.508 |
| CC3251 | CC3151 | 195.00 | 1.508 |
| CC3151 | CC3153 | 195.00 | 1.508 |
| CC3151 | CC3152 | 195.00 | 1.508 |
| CC3151 | CC3051 | 195.00 | 1.508 |
| CC3151 | CC3151 | 195.00 | 1.508 |
| CC3153 | CC321  | 222.50 | 1.490 |
| CC3051 | CC321  | 222.50 | 1.490 |
| CC3152 | OC301  | 360.00 | 1.395 |
| CC331  | OC301  | 360.00 | 1.415 |
| CC331  | HCA3   | 322.00 | 1.111 |

ANGLES

|        |        |        |        |        |
|--------|--------|--------|--------|--------|
| OC3C51 | CC3152 | CC3251 | 45.00  | 111.10 |
| OC3C51 | CC3051 | CC3251 | 45.00  | 111.10 |
| OC3C51 | CC3152 | CC3151 | 45.00  | 111.10 |
| OC3C51 | CC3051 | CC3151 | 45.00  | 111.10 |
| OC3C51 | CC3153 | CC3151 | 45.00  | 111.10 |
| OC3C51 | CC3153 | CC321  | 45.000 | 108.00 |
| OC3C51 | CC3051 | CC321  | 45.000 | 108.00 |
| OC311  | CC3151 | CC3251 | 75.700 | 110.10 |
| OC311  | CC3151 | CC3153 | 75.700 | 110.10 |
| OC311  | CC3151 | CC3152 | 75.700 | 110.10 |
| OC311  | CC3151 | CC3051 | 75.700 | 110.10 |
| OC311  | CC3151 | CC3151 | 75.700 | 110.10 |
| OC311  | CC321  | CC3153 | 75.700 | 110.10 |
| OC311  | CC321  | CC3152 | 75.700 | 110.10 |
| OC311  | CC321  | CC3051 | 75.700 | 110.10 |
| OC311  | CC3152 | CC3251 | 75.700 | 110.10 |



|        |        |        |        |        |       |       |
|--------|--------|--------|--------|--------|-------|-------|
| OC311  | CC3051 | CC3251 | 75.700 | 110.10 |       |       |
| OC311  | CC3152 | CC321  | 75.700 | 110.10 |       |       |
| OC311  | CC3051 | CC321  | 75.700 | 110.10 |       |       |
| OC311  | CC3152 | CC3151 | 75.700 | 110.10 |       |       |
| OC311  | CC3051 | CC3151 | 75.700 | 110.10 |       |       |
| OC3C51 | CC3152 | OC311  | 45.000 | 116.50 |       |       |
| OC3C51 | CC3051 | OC311  | 45.000 | 116.50 |       |       |
| OC3C51 | CC3152 | HCA1   | 70.00  | 107.30 |       |       |
| OC3C51 | CC3153 | HCA1   | 70.00  | 107.30 |       |       |
| OC311  | CC3152 | HCA1   | 55.000 | 108.89 |       |       |
| OC311  | CC3151 | HCA1   | 55.000 | 108.89 |       |       |
| CC3152 | OC311  | HCP1   | 50.000 | 109.00 |       |       |
| CC3051 | OC311  | HCP1   | 50.000 | 109.00 |       |       |
| CC3151 | OC311  | HCP1   | 50.000 | 109.00 |       |       |
| CC3153 | OC3C51 | CC3152 | 95.00  | 111.00 |       |       |
| CC3153 | OC3C51 | CC3051 | 95.00  | 111.00 |       |       |
| CC3152 | CC3251 | CC3151 | 58.00  | 109.50 | 11.16 | 2.561 |
| CC3051 | CC3251 | CC3151 | 58.00  | 109.50 | 11.16 | 2.561 |
| CC3152 | CC3151 | CC3151 | 58.00  | 109.50 | 11.16 | 2.561 |
| CC3051 | CC3151 | CC3151 | 58.00  | 109.50 | 11.16 | 2.561 |
| CC3251 | CC3151 | CC3153 | 58.00  | 109.50 | 11.16 | 2.561 |
| CC3151 | CC3151 | CC3153 | 58.00  | 109.50 | 11.16 | 2.561 |
| CC3151 | CC3153 | CC321  | 58.35  | 113.50 | 11.16 | 2.561 |
| CC3151 | CC3051 | CC321  | 58.35  | 113.50 | 11.16 | 2.561 |
| CC3152 | CC3251 | HCA2   | 35.00  | 111.40 | 22.53 | 2.179 |
| CC3051 | CC3251 | HCA2   | 35.00  | 111.40 | 22.53 | 2.179 |
| CC3251 | CC3152 | HCA1   | 35.00  | 111.40 | 22.53 | 2.179 |
| CC3251 | CC3151 | HCA1   | 35.00  | 111.40 | 22.53 | 2.179 |
| CC3151 | CC3251 | HCA2   | 35.00  | 111.40 | 22.53 | 2.179 |
| CC3153 | CC3151 | HCA1   | 35.00  | 111.40 | 22.53 | 2.179 |
| CC3152 | CC3151 | HCA1   | 35.00  | 111.40 | 22.53 | 2.179 |
| CC3051 | CC3151 | HCA1   | 35.00  | 111.40 | 22.53 | 2.179 |
| CC3151 | CC3151 | HCA1   | 35.00  | 111.40 | 22.53 | 2.179 |
| CC3151 | CC3152 | HCA1   | 35.00  | 111.40 | 22.53 | 2.179 |
| CC3151 | CC3153 | HCA1   | 35.00  | 111.40 | 22.53 | 2.179 |
| CC3153 | CC321  | HCA2   | 33.43  | 110.10 | 22.53 | 2.179 |
| CC3152 | CC321  | HCA2   | 33.43  | 110.10 | 22.53 | 2.179 |
| CC3051 | CC321  | HCA2   | 33.43  | 110.10 | 22.53 | 2.179 |
| CC321  | CC3153 | HCA1   | 34.50  | 110.10 | 22.53 | 2.179 |
| HCA2   | CC3251 | HCA2   | 38.50  | 106.80 | 5.40  | 1.802 |
| HCA1   | CC3152 | OC301  | 60.00  | 109.50 |       |       |
| OC301  | CC3152 | CC3151 | 45.00  | 105.00 |       |       |
| CC3152 | OC301  | CC331  | 95.00  | 111.00 |       |       |
| OC301  | CC3152 | OC3C51 | 90.00  | 112.00 |       |       |
| OC301  | CC331  | HCA3   | 60.00  | 109.50 |       |       |

DIHEDRALS

|        |        |        |       |      |   |       |
|--------|--------|--------|-------|------|---|-------|
| 0C3C51 | CC3152 | OC311  | HCP1  | 1.17 | 1 | 0.0   |
| 0C3C51 | CC3152 | OC311  | HCP1  | 0.85 | 2 | 0.0   |
| 0C3C51 | CC3152 | OC311  | HCP1  | 0.37 | 3 | 0.0   |
| 0C3C51 | CC3051 | OC311  | HCP1  | 0.90 | 1 | 0.0   |
| 0C3C51 | CC3051 | OC311  | HCP1  | 1.14 | 2 | 0.0   |
| 0C3C51 | CC3051 | OC311  | HCP1  | 0.11 | 3 | 180.0 |
| 0C3C51 | CC3152 | CC3251 | HCA2  | 0.20 | 3 | 0.0   |
| 0C3C51 | CC3051 | CC3251 | HCA2  | 0.20 | 3 | 0.0   |
| 0C3C51 | CC3152 | CC3151 | HCA1  | 0.20 | 3 | 0.0   |
| 0C3C51 | CC3051 | CC3151 | HCA1  | 0.20 | 3 | 0.0   |
| 0C3C51 | CC3153 | CC3151 | HCA1  | 0.20 | 3 | 0.0   |
| 0C3C51 | CC3153 | CC321  | HCA2  | 0.20 | 3 | 0.0   |
| 0C3C51 | CC3152 | CC321  | HCA2  | 0.20 | 3 | 0.0   |
| 0C3C51 | CC3051 | CC321  | HCA2  | 0.20 | 3 | 0.0   |
| OC311  | CC3152 | CC3251 | HCA2  | 0.14 | 3 | 0.0   |
| OC311  | CC3051 | CC3251 | HCA2  | 0.14 | 3 | 0.0   |
| OC311  | CC3051 | CC321  | HCA2  | 0.14 | 3 | 0.0   |
| OC311  | CC3151 | CC3251 | HCA2  | 0.14 | 3 | 0.0   |
| OC311  | CC3151 | CC3153 | HCA1  | 0.14 | 3 | 0.0   |
| OC311  | CC3151 | CC3152 | HCA1  | 0.14 | 3 | 0.0   |
| OC311  | CC3151 | CC3151 | HCA1  | 0.14 | 3 | 0.0   |
| OC311  | CC3152 | CC3151 | HCA1  | 0.14 | 3 | 0.0   |
| OC311  | CC3051 | CC3151 | HCA1  | 0.14 | 3 | 0.0   |
| OC311  | CC321  | CC3153 | HCA1  | 0.14 | 3 | 0.0   |
| 0C3C51 | CC3153 | CC3151 | OC311 | 0.14 | 1 | 0.0   |
| 0C3C51 | CC3153 | CC3151 | OC311 | 0.70 | 2 | 0.0   |
| 0C3C51 | CC3153 | CC3151 | OC311 | 0.18 | 3 | 0.0   |
| 0C3C51 | CC3152 | CC3151 | OC311 | 1.26 | 1 | 180.0 |
| 0C3C51 | CC3152 | CC3151 | OC311 | 1.27 | 2 | 0.0   |
| 0C3C51 | CC3152 | CC3151 | OC311 | 0.53 | 3 | 0.0   |
| 0C3C51 | CC3051 | CC3151 | OC311 | 0.32 | 1 | 180.0 |
| 0C3C51 | CC3051 | CC3151 | OC311 | 0.65 | 2 | 180.0 |
| 0C3C51 | CC3051 | CC3151 | OC311 | 2.62 | 3 | 0.0   |
| 0C3C51 | CC3153 | CC321  | OC311 | 1.50 | 1 | 180.0 |
| 0C3C51 | CC3153 | CC321  | OC311 | 0.58 | 2 | 0.0   |
| 0C3C51 | CC3153 | CC321  | OC311 | 0.54 | 3 | 0.0   |
| 0C3C51 | CC3051 | CC321  | OC311 | 0.52 | 1 | 0.0   |
| 0C3C51 | CC3051 | CC321  | OC311 | 1.16 | 2 | 180.0 |
| 0C3C51 | CC3051 | CC321  | OC311 | 0.33 | 3 | 180.0 |
| OC311  | CC3152 | CC3151 | OC311 | 2.87 | 1 | 180.0 |
| OC311  | CC3152 | CC3151 | OC311 | 0.03 | 2 | 0.0   |
| OC311  | CC3152 | CC3151 | OC311 | 0.23 | 3 | 0.0   |
| OC311  | CC3051 | CC3151 | OC311 | 0.12 | 1 | 180.0 |
| OC311  | CC3051 | CC3151 | OC311 | 1.87 | 2 | 180.0 |
| OC311  | CC3051 | CC3151 | OC311 | 1.64 | 3 | 180.0 |
| OC311  | CC3151 | CC3151 | OC311 | 2.87 | 1 | 180.0 |

|        |        |        |        |      |   |       |
|--------|--------|--------|--------|------|---|-------|
| OC311  | CC3151 | CC3151 | OC311  | 0.03 | 2 | 0.0   |
| OC311  | CC3151 | CC3151 | OC311  | 0.23 | 3 | 0.0   |
| OC311  | CC3051 | CC321  | OC311  | 0.07 | 1 | 0.0   |
| OC311  | CC3051 | CC321  | OC311  | 1.99 | 2 | 180.0 |
| OC311  | CC3051 | CC321  | OC311  | 1.72 | 3 | 180.0 |
| OC311  | CC3152 | OC3C51 | CC3153 | 0.76 | 1 | 180.0 |
| OC311  | CC3152 | OC3C51 | CC3153 | 1.25 | 2 | 0.0   |
| OC311  | CC3152 | OC3C51 | CC3153 | 0.48 | 3 | 180.0 |
| OC311  | CC3051 | OC3C51 | CC3153 | 0.19 | 1 | 180.0 |
| OC311  | CC3051 | OC3C51 | CC3153 | 2.85 | 2 | 180.0 |
| OC311  | CC3051 | OC3C51 | CC3153 | 0.86 | 3 | 0.0   |
| CC3152 | CC3251 | CC3151 | CC3153 | 1.83 | 3 | 0.0   |
| CC3051 | CC3251 | CC3151 | CC3153 | 1.83 | 3 | 0.0   |
| CC3152 | CC3151 | CC3151 | CC3153 | 0.64 | 3 | 180.0 |
| CC3051 | CC3151 | CC3151 | CC3153 | 2.37 | 3 | 0.0   |
| CC3251 | CC3151 | CC3153 | CC321  | 0.20 | 3 | 0.0   |
| CC3151 | CC3151 | CC3153 | CC321  | 0.20 | 3 | 0.0   |
| CC3151 | CC3151 | CC3051 | CC321  | 0.20 | 3 | 0.0   |
| CC3152 | CC3251 | CC3151 | OC311  | 0.39 | 1 | 0.0   |
| CC3152 | CC3251 | CC3151 | OC311  | 1.20 | 2 | 0.0   |
| CC3152 | CC3251 | CC3151 | OC311  | 1.42 | 3 | 180.0 |
| CC3051 | CC3251 | CC3151 | OC311  | 0.39 | 1 | 0.0   |
| CC3051 | CC3251 | CC3151 | OC311  | 1.20 | 2 | 0.0   |
| CC3051 | CC3251 | CC3151 | OC311  | 1.42 | 3 | 180.0 |
| CC3153 | CC3151 | CC3151 | OC311  | 0.01 | 1 | 180.0 |
| CC3153 | CC3151 | CC3151 | OC311  | 0.72 | 2 | 0.0   |
| CC3153 | CC3151 | CC3151 | OC311  | 0.73 | 3 | 0.0   |
| CC3152 | CC3151 | CC3151 | OC311  | 0.81 | 1 | 180.0 |
| CC3152 | CC3151 | CC3151 | OC311  | 1.07 | 2 | 0.0   |
| CC3152 | CC3151 | CC3151 | OC311  | 0.11 | 3 | 0.0   |
| CC3051 | CC3151 | CC3151 | OC311  | 2.07 | 1 | 0.0   |
| CC3051 | CC3151 | CC3151 | OC311  | 2.13 | 2 | 0.0   |
| CC3051 | CC3151 | CC3151 | OC311  | 2.71 | 3 | 180.0 |
| CC3151 | CC3251 | CC3152 | OC311  | 0.56 | 1 | 180.0 |
| CC3151 | CC3251 | CC3152 | OC311  | 0.30 | 2 | 180.0 |
| CC3151 | CC3251 | CC3152 | OC311  | 0.35 | 3 | 180.0 |
| CC3151 | CC3251 | CC3051 | OC311  | 0.56 | 1 | 180.0 |
| CC3151 | CC3251 | CC3051 | OC311  | 0.30 | 2 | 180.0 |
| CC3151 | CC3251 | CC3051 | OC311  | 0.35 | 3 | 180.0 |
| CC3151 | CC3151 | CC3152 | OC311  | 0.11 | 1 | 180.0 |
| CC3151 | CC3151 | CC3152 | OC311  | 0.66 | 2 | 0.0   |
| CC3151 | CC3151 | CC3152 | OC311  | 0.02 | 3 | 180.0 |
| CC3151 | CC3151 | CC3051 | OC311  | 2.23 | 1 | 0.0   |
| CC3151 | CC3151 | CC3051 | OC311  | 3.00 | 2 | 0.0   |
| CC3151 | CC3151 | CC3051 | OC311  | 0.88 | 3 | 180.0 |
| CC3151 | CC3153 | CC321  | OC311  | 0.01 | 1 | 0.0   |

|        |        |        |        |      |   |       |
|--------|--------|--------|--------|------|---|-------|
| CC3151 | CC3153 | CC321  | OC311  | 0.14 | 2 | 0.0   |
| CC3151 | CC3153 | CC321  | OC311  | 0.70 | 3 | 180.0 |
| CC3151 | CC3051 | CC321  | OC311  | 1.59 | 1 | 0.0   |
| CC3151 | CC3051 | CC321  | OC311  | 0.95 | 2 | 180.0 |
| CC3151 | CC3051 | CC321  | OC311  | 1.95 | 3 | 0.0   |
| CC321  | CC3153 | CC3151 | OC311  | 0.76 | 1 | 180.0 |
| CC321  | CC3153 | CC3151 | OC311  | 0.40 | 2 | 180.0 |
| CC321  | CC3153 | CC3151 | OC311  | 0.40 | 3 | 180.0 |
| CC321  | CC3051 | CC3151 | OC311  | 0.94 | 1 | 0.0   |
| CC321  | CC3051 | CC3151 | OC311  | 1.59 | 2 | 180.0 |
| CC321  | CC3051 | CC3151 | OC311  | 0.84 | 3 | 0.0   |
| CC3151 | CC3151 | CC3153 | OC3C51 | 1.24 | 3 | 0.0   |
| CC3151 | CC3151 | CC3152 | OC3C51 | 1.24 | 3 | 0.0   |
| CC3251 | CC3151 | CC3153 | OC3C51 | 0.94 | 3 | 0.0   |
| CC3151 | CC3251 | CC3152 | OC3C51 | 0.94 | 3 | 0.0   |
| CC3151 | CC3251 | CC3051 | OC3C51 | 0.94 | 3 | 0.0   |
| CC3151 | CC3151 | CC3051 | OC3C51 | 0.62 | 3 | 0.0   |
| CC3251 | CC3152 | OC311  | HCP1   | 0.59 | 1 | 0.0   |
| CC3251 | CC3152 | OC311  | HCP1   | 0.38 | 2 | 0.0   |
| CC3251 | CC3152 | OC311  | HCP1   | 0.13 | 3 | 0.0   |
| CC3251 | CC3051 | OC311  | HCP1   | 0.59 | 1 | 0.0   |
| CC3251 | CC3051 | OC311  | HCP1   | 0.38 | 2 | 0.0   |
| CC3251 | CC3051 | OC311  | HCP1   | 0.13 | 3 | 0.0   |
| CC321  | CC3051 | OC311  | HCP1   | 0.40 | 1 | 180.0 |
| CC321  | CC3051 | OC311  | HCP1   | 0.48 | 2 | 0.0   |
| CC321  | CC3051 | OC311  | HCP1   | 0.19 | 3 | 0.0   |
| CC3151 | CC3152 | OC311  | HCP1   | 0.29 | 1 | 0.0   |
| CC3151 | CC3152 | OC311  | HCP1   | 0.55 | 2 | 0.0   |
| CC3151 | CC3152 | OC311  | HCP1   | 0.08 | 3 | 0.0   |
| CC3151 | CC3051 | OC311  | HCP1   | 0.40 | 1 | 180.0 |
| CC3151 | CC3051 | OC311  | HCP1   | 0.48 | 2 | 0.0   |
| CC3151 | CC3051 | OC311  | HCP1   | 0.19 | 3 | 0.0   |
| CC3151 | CC3151 | OC311  | HCP1   | 0.29 | 1 | 0.0   |
| CC3151 | CC3151 | OC311  | HCP1   | 0.55 | 2 | 0.0   |
| CC3151 | CC3151 | OC311  | HCP1   | 0.08 | 3 | 0.0   |
| CC3152 | CC3151 | OC311  | HCP1   | 0.29 | 1 | 0.0   |
| CC3152 | CC3151 | OC311  | HCP1   | 0.55 | 2 | 0.0   |
| CC3152 | CC3151 | OC311  | HCP1   | 0.08 | 3 | 0.0   |
| CC3051 | CC3151 | OC311  | HCP1   | 0.40 | 1 | 180.0 |
| CC3051 | CC3151 | OC311  | HCP1   | 0.48 | 2 | 0.0   |
| CC3051 | CC3151 | OC311  | HCP1   | 0.19 | 3 | 0.0   |
| CC3251 | CC3151 | OC311  | HCP1   | 0.59 | 1 | 0.0   |
| CC3251 | CC3151 | OC311  | HCP1   | 0.38 | 2 | 0.0   |
| CC3251 | CC3151 | OC311  | HCP1   | 0.13 | 3 | 0.0   |
| CC3153 | CC3151 | OC311  | HCP1   | 0.29 | 1 | 0.0   |
| CC3153 | CC3151 | OC311  | HCP1   | 0.55 | 2 | 0.0   |

|        |        |        |        |      |   |       |
|--------|--------|--------|--------|------|---|-------|
| CC3153 | CC3151 | OC311  | HCP1   | 0.08 | 3 | 0.0   |
| CC3153 | CC321  | OC311  | HCP1   | 0.12 | 1 | 0.0   |
| CC3153 | CC321  | OC311  | HCP1   | 0.42 | 2 | 0.0   |
| CC3153 | CC321  | OC311  | HCP1   | 0.29 | 3 | 0.0   |
| CC3051 | CC321  | OC311  | HCP1   | 0.40 | 1 | 180.0 |
| CC3051 | CC321  | OC311  | HCP1   | 0.48 | 2 | 0.0   |
| CC3051 | CC321  | OC311  | HCP1   | 0.19 | 3 | 0.0   |
| CC3152 | CC3251 | CC3151 | HCA1   | 0.20 | 3 | 0.0   |
| CC3051 | CC3251 | CC3151 | HCA1   | 0.20 | 3 | 0.0   |
| CC3151 | CC3251 | CC3152 | HCA1   | 0.20 | 3 | 0.0   |
| CC3151 | CC3151 | CC3152 | HCA1   | 0.20 | 3 | 0.0   |
| CC3151 | CC3151 | CC3153 | HCA1   | 0.20 | 3 | 0.0   |
| CC3151 | CC3153 | CC321  | HCA2   | 0.20 | 3 | 0.0   |
| CC3151 | CC3152 | CC321  | HCA2   | 0.20 | 3 | 0.0   |
| CC3151 | CC3051 | CC321  | HCA2   | 0.20 | 3 | 0.0   |
| CC3153 | CC3151 | CC3251 | HCA2   | 0.20 | 3 | 0.0   |
| CC3153 | CC3151 | CC3151 | HCA1   | 0.20 | 3 | 0.0   |
| CC3152 | CC3151 | CC3151 | HCA1   | 0.20 | 3 | 0.0   |
| CC3051 | CC3151 | CC3151 | HCA1   | 0.20 | 3 | 0.0   |
| CC321  | CC3153 | CC3151 | HCA1   | 0.20 | 3 | 0.0   |
| CC321  | CC3152 | CC3151 | HCA1   | 0.20 | 3 | 0.0   |
| CC321  | CC3051 | CC3151 | HCA1   | 0.20 | 3 | 0.0   |
| CC3251 | CC3151 | CC3153 | HCA1   | 0.20 | 3 | 0.0   |
| CC3152 | OC3C51 | CC3153 | CC3151 | 1.00 | 3 | 0.0   |
| CC3153 | OC3C51 | CC3152 | CC3151 | 1.00 | 3 | 0.0   |
| CC3153 | OC3C51 | CC3152 | CC3251 | 0.45 | 3 | 0.0   |
| CC3153 | OC3C51 | CC3051 | CC3151 | 0.61 | 3 | 0.0   |
| CC3153 | OC3C51 | CC3051 | CC3251 | 0.61 | 3 | 0.0   |
| CC3051 | OC3C51 | CC3153 | CC3151 | 0.43 | 3 | 0.0   |
| CC3152 | OC3C51 | CC3153 | CC321  | 0.30 | 3 | 0.0   |
| CC3051 | OC3C51 | CC3153 | CC321  | 2.58 | 1 | 0.0   |
| CC3051 | OC3C51 | CC3153 | CC321  | 0.24 | 2 | 180.0 |
| CC3051 | OC3C51 | CC3153 | CC321  | 0.36 | 3 | 180.0 |
| CC3153 | OC3C51 | CC3051 | CC321  | 0.24 | 1 | 0.0   |
| CC3153 | OC3C51 | CC3051 | CC321  | 3.00 | 2 | 180.0 |
| CC3153 | OC3C51 | CC3051 | CC321  | 1.38 | 3 | 180.0 |
| CC3152 | OC3C51 | CC3153 | HCA1   | 0.30 | 3 | 0.0   |
| CC3051 | OC3C51 | CC3153 | HCA1   | 0.30 | 3 | 0.0   |
| CC3153 | OC3C51 | CC3152 | HCA1   | 0.30 | 3 | 0.0   |
| HCA1   | CC3152 | CC3251 | HCA2   | 0.20 | 3 | 0.0   |
| HCA2   | CC3251 | CC3151 | HCA1   | 0.20 | 3 | 0.0   |
| HCA1   | CC3151 | CC3153 | HCA1   | 0.20 | 3 | 0.0   |
| HCA1   | CC3151 | CC3152 | HCA1   | 0.20 | 3 | 0.0   |
| HCA1   | CC3151 | CC3151 | HCA1   | 0.20 | 3 | 0.0   |
| HCA1   | CC3153 | CC321  | HCA2   | 0.20 | 3 | 0.0   |
| HCP1   | OC311  | CC3152 | HCA1   | 0.18 | 3 | 0.0   |

|        |        |        |        |       |   |       |
|--------|--------|--------|--------|-------|---|-------|
| HCP1   | OC311  | CC3151 | HCA1   | 0.18  | 3 | 0.0   |
| OC301  | CC3152 | CC3151 | OC311  | 2.87  | 1 | 180.0 |
| OC301  | CC3152 | CC3151 | OC311  | 0.03  | 2 | 0.0   |
| OC301  | CC3152 | CC3151 | OC311  | 0.23  | 3 | 0.0   |
| CC3152 | OC301  | CC331  | HCA3   | 0.284 | 3 | 0.0   |
| HCA1   | CC3152 | OC301  | CC331  | 0.284 | 3 | 0.0   |
| OC301  | CC3152 | CC3151 | HCA1   | 0.20  | 3 | 0.0   |
| CC3151 | CC3151 | CC3152 | OC301  | 0.11  | 1 | 180.0 |
| CC3151 | CC3151 | CC3152 | OC301  | 0.66  | 2 | 0.0   |
| CC3151 | CC3151 | CC3152 | OC301  | 0.02  | 3 | 180.0 |
| CC3151 | CC3151 | CC3051 | OC301  | 2.23  | 1 | 0.0   |
| CC3151 | CC3151 | CC3051 | OC301  | 3.00  | 2 | 0.0   |
| CC3151 | CC3151 | CC3051 | OC301  | 0.88  | 3 | 180.0 |
| OC301  | CC3152 | OC3C51 | CC3153 | 0.76  | 1 | 180.0 |
| OC301  | CC3152 | OC3C51 | CC3153 | 1.25  | 2 | 0.0   |
| OC301  | CC3152 | OC3C51 | CC3153 | 0.48  | 3 | 180.0 |
| CC3153 | OC3C51 | CC3051 | OC301  | 0.19  | 1 | 180.0 |
| CC3153 | OC3C51 | CC3051 | OC301  | 2.85  | 2 | 180.0 |
| CC3153 | OC3C51 | CC3051 | OC301  | 0.86  | 3 | 0.0   |
| CC3151 | CC3152 | OC301  | CC331  | 0.21  | 1 | 180.0 |
| CC3151 | CC3152 | OC301  | CC331  | 0.34  | 2 | 180.0 |
| CC3151 | CC3152 | OC301  | CC331  | 0.74  | 3 | 180.0 |
| CC331  | OC301  | CC3152 | OC3C51 | 0.08  | 1 | 0.0   |
| CC331  | OC301  | CC3152 | OC3C51 | 0.76  | 2 | 0.0   |
| CC331  | OC301  | CC3152 | OC3C51 | 1.18  | 3 | 0.0   |

NONBONDED NBXMOD 5 ATOM CDIEL FSHIFT VATOM VDISTANCE VFSWITCH -

CUTNB 14.0 CTOFNB 12.0 CTONNB 10.0 EPS 1.0 E14FAC 1.0 WMIN 1.5

|        |     |         |       |     |       |     |
|--------|-----|---------|-------|-----|-------|-----|
| CC331  | 0.0 | -0.0780 | 2.040 | 0.0 | -0.01 | 1.9 |
| HCA3   | 0.0 | -0.0240 | 1.340 |     |       |     |
| OC301  | 0.0 | -0.1000 | 1.650 |     |       |     |
| OC3C51 | 0.0 | -0.1000 | 1.650 |     |       |     |
| CC3152 | 0.0 | -0.0320 | 2.000 | 0.0 | -0.01 | 1.9 |
| CC3051 | 0.0 | -0.0320 | 2.000 | 0.0 | -0.01 | 1.9 |
| CC3251 | 0.0 | -0.0600 | 2.020 | 0.0 | -0.01 | 1.9 |
| CC3151 | 0.0 | -0.0320 | 2.000 | 0.0 | -0.01 | 1.9 |
| CC3153 | 0.0 | -0.0320 | 2.000 | 0.0 | -0.01 | 1.9 |

END
